# Supplementary material for: Phosphorus vacancy-engineered Ce-doped CoP nanosheets for the electrocatalytic oxidation of 5-hydroxymethylfurfural
Source: Royal Society of Chemistry journal article supplement (doi:10.1039/d2cc02451a), 2022-01-01
Supplement: d2cc02451a1.pdf [file d2cc02451a1.pdf]

## **Electronic Supplementary Information (ESI)**

### **Phosphorus vacancy-engineered Ce-doped CoP nanosheets for electrocatalytic oxidation of 5-hydroxymethylfurfural**

Jiahui Bi, Hao Ying, Hui Xu, Xiaoning Zhao, Xinyun Du, Jingcheng Hao, Zhonghao Li\*

Key Laboratory of Colloid and Interface Chemistry, Ministry of Education, Shandong University, Jinan, 250100, China, E-mail: zhonghaoli@sdu.edu.cn

## **Experimental Section**

### **Materials and chemicals**

Choline chloride (ChCl), oxalic acid ( $\text{H}_2\text{C}_2\text{O}_4$ ), potassium chloride (KCl) and sodium hypophosphite ( $\text{NaH}_2\text{PO}_2$ ) were all obtained from Aladdin Chemistry Co., Ltd. Potassium hydroxide (KOH) and Cobalt chloride hexahydrate ( $\text{CoCl}_2 \cdot 6\text{H}_2\text{O}$ ) were purchased from Sinopharm Chemical Reagent Co. Ltd. Cerium nitrate hexahydrate ( $\text{Ce}(\text{NO}_3)_3$ ) was purchased from Tianjin Kermel Chemical Reagent Co., Ltd. 5-hydroxymethylfurfural (HMF), 2,5-furandicarboxylic acid (FDCA), 5-formyl furan-2-carboxylic acid (FFCA) and 5-hydroxymethyl-2-furan-carboxylic acid (HMFCFA) were purchased from Alfa-Aesar. 2,5-diformyl furan (DFF) was purchased from Tokyo Chemical Industry Co., Ltd. 5 wt% nafion solution was purchased from the Sigma Co., Ltd. Carbon cloth was obtained from Changsha Lyrun Material Co., Ltd. Nafion 115 membrane was purchased from Wuhan GaossUnion technology Co., Ltd.

### **Synthesis of choline chloride/oxalic acid (ChCl/OA) DES**

Equimolar oxalic acid reacted with choline chloride by magnetic stirring at 80 °C for 30 minutes, and ChCl/OA DES was then obtained.

### **Synthesis of Ce-doped CoP nanosheets**

The CoP with different Ce doping amount was labelled as  $x\text{Ce-CoP}$ , where  $x$  represented the actual atomic ratio of  $\text{Ce}/(\text{Co}+\text{Ce})$  in the obtained Ce-CoP. In a typical procedure, 6.09 mg  $\text{Ce}(\text{NO}_3)_3$  and 30 mg  $\text{CoCl}_2 \cdot 6\text{H}_2\text{O}$  were dissolved in 1 mL ChCl/OA DES with ultrasonic treatment at 40 °C. Subsequently, the obtained transparent blue liquid was transferred into microwave oven, which was microwave- heated at 100 W

for 15 s to obtain the Ce/Co-based precursor. Then, the precursor was recovered and rinsed with ethanol and desiccated at room temperature overnight in a vacuum.

After that, the  $\text{NaH}_2\text{PO}_2$  and the dry precursor were placed upstream and downstream in a corundum tube of the tube furnace, respectively. Then, Ce-CoP was obtained by heat-treating the precursor at 350 °C for 2 h with 10 °C  $\text{min}^{-1}$  in  $\text{N}_2$  flow. Finally, the obtained Ce-CoP nanosheets were washed with water and ethanol, then were dried in the vacuum oven. The obtained Ce-CoP was determined to be 5.2% Ce-CoP based on the energy-dispersive X-ray (EDX) result.

For comparison, 3% Ce-CoP and 10% Ce-CoP were prepared by the same method except that the adding amount of  $\text{Ce}(\text{NO}_3)_3$  were 1.6 mg and 9.65mg respectively. The undoped CoP was synthesized via the same process without addition of  $\text{Ce}(\text{NO}_3)_3$ .

## **Characterizations**

Rigaku SmartLab 9KW X-ray diffractometer was used to obtain the X-ray diffraction (XRD) patterns. Transmission electron microscopy (TEM) was performed on a JEM-1400 microscope. Characterization of scanning electron microscopy (SEM) and energy-dispersive X-ray (EDX) were done by Zeiss Sigma 300. High-resolution transmission electron microscopy (HRTEM) images were obtained from JEM-2100 microscope. X-ray photoelectron spectroscopy (XPS) measurements were performed by a Thermo Fisher ESCALAB XI. Nitrogen adsorption-desorption tests were conducted on the micromeritics ASAP 2460. Electron paramagnetic resonance (EPR) measurements were tested on the Bruker A300. High performance liquid chromatography (HPLC) analysis was performed using an Agilent G7114A system.

## Electrochemical Measurements

Electrochemical characterizations were tested on a CHI760E workstation. Here, carbon paper-loaded catalysts (working electrode), Ag/AgCl (reference electrode, in saturated KCl solution), and platinum foil (counter electrode) were utilized. 1 M KOH (10 mL) solution with or without 10 mM HMF was used as electrolytes.

For the working electrode fabrication, catalysts (4 mg) were put into the mixture of nafion solution (20  $\mu$ L, 5 wt%) and ethanol (180  $\mu$ L). The mixture was then sonicated (30 min) to achieve a catalyst ink. Next, 200  $\mu$ L of the resulting ink was drop-coated on the carbon paper (1  $\times$  1 cm<sup>2</sup>) using a spray gun and dried. All of the potentials were referenced against the reversible hydrogen electrode (RHE) by the formula:

$$E(\text{RHE}) = E(\text{Ag/AgCl}) + 0.197 + 0.059 \times \text{pH}$$

## Products analysis

The concentrations of the components in the electrolyte were determined by high-performance liquid chromatography (HPLC) using a 4.6 mm  $\times$  250 mm Zorbax SB-C18 5  $\mu$ m column and an ultraviolet-visible detector. Specifically, 10  $\mu$ L electrolyte was taken out and diluted to 0.5 mL with ultrapure water and analyzed by HPLC. The wavelength of UV-Vis detector was 265 nm. HPLC eluents were mixtures of 5 mM aqueous ammonium formate and methanol. The separation and quantification were performed using an isocratic elution with 5 mM aqueous ammonium formate solution (volume: 70%) and methanol (volume: 30%) at a flow rate of 1 mL min<sup>-1</sup>.

The HMF conversion, selectivity and faradaic efficiency (FE) were achieved according to following equations:

$$\text{HMF conversion (\%)} = \frac{n_{\text{HMF consumption}}}{n_{\text{HMF initial value}}} \times 100\%$$

$$\text{Selectivity (\%)} = \frac{n_{\text{Product formation}}}{n_{\text{HMF initial value}}} \times 100\%$$

$$\text{Faraday efficiency (\%)} = \frac{n_{\text{FDCA formation}} \times 6F}{Q}$$

Where, Q is the total transferred charge and F is 96485 C mol<sup>-1</sup> (Faraday constant).

The quantity of product is determined by HPLC analysis.

### Density functional theory (DFT) Calculation

The present first principle DFT calculations were accomplished by Vienna Ab initio Simulation Package (VASP)<sup>1</sup> with the projector augmented wave (PAW) method.<sup>2</sup> The exchange-functional was handled using the generalized gradient approximation (GGA) of Perdew-Burke-Ernzerhof (PBE)<sup>3</sup> functional. The energy cutoff for the plane wave basis expansion was set to 450 eV and the force on each atom less than 0.02 eV/Å was set for convergence criterion of geometry relaxation. A 15 Å vacuum was added along the z direction in order to avoid the interaction between periodic structures. The Brillouin zone integration was performed using 2×2×1 k-point sampling. The self-consistent calculations applied a convergence energy threshold of 10<sup>-5</sup> eV.

The adsorption energy of HMF was calculated according to the following equation:

$$E_{ads} = E_{total} - E_{mol} - E_{sub}$$

where the  $E_{total}$  is the total energy of the HMF adsorbed on the CoP or Ce-CoP substrate,  $E_{mol}$  and  $E_{sub}$  were the energies of the isolated HMF molecule and the substrate, respectively.

The charge density differences were defined as  $\Delta\rho = \rho(\text{Ce-CoP}) - \rho(\text{CoP}) - \rho(\text{Ce})$ ,

where  $\rho(\text{Ce-CoP})$ ,  $\rho(\text{CoP})$  and  $\rho(\text{Ce})$  were the unperturbed electron densities of the Ce doped CoP with P vacancy, pure CoP with P vacancy and Ce atom, respectively

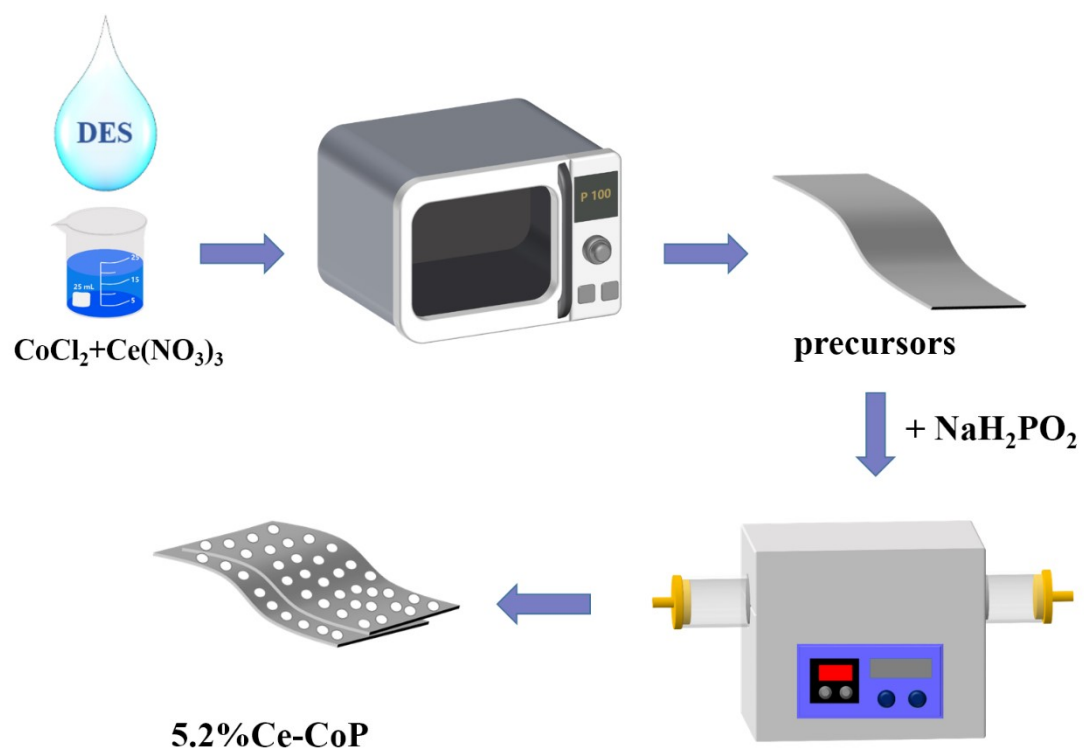

**Fig. S1** Schematic diagram of Ce-doped CoP nanosheet synthesis.

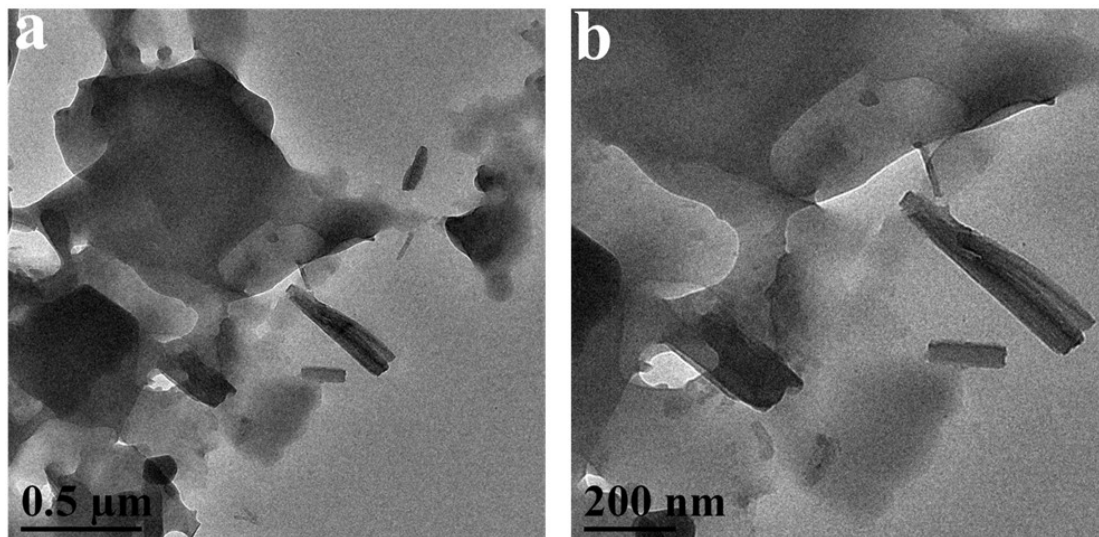

**Fig. S2** Low- and high- magnification TEM images of the precursors obtained after microwave heating 1 mL ChCl/OA DES with 6.09 mg  $\text{Ce}(\text{NO}_3)_3$  and 30 mg  $\text{CoCl}_2$ . This obtained precursor will be used for synthesizing 5.2%Ce-CoP nanosheets.



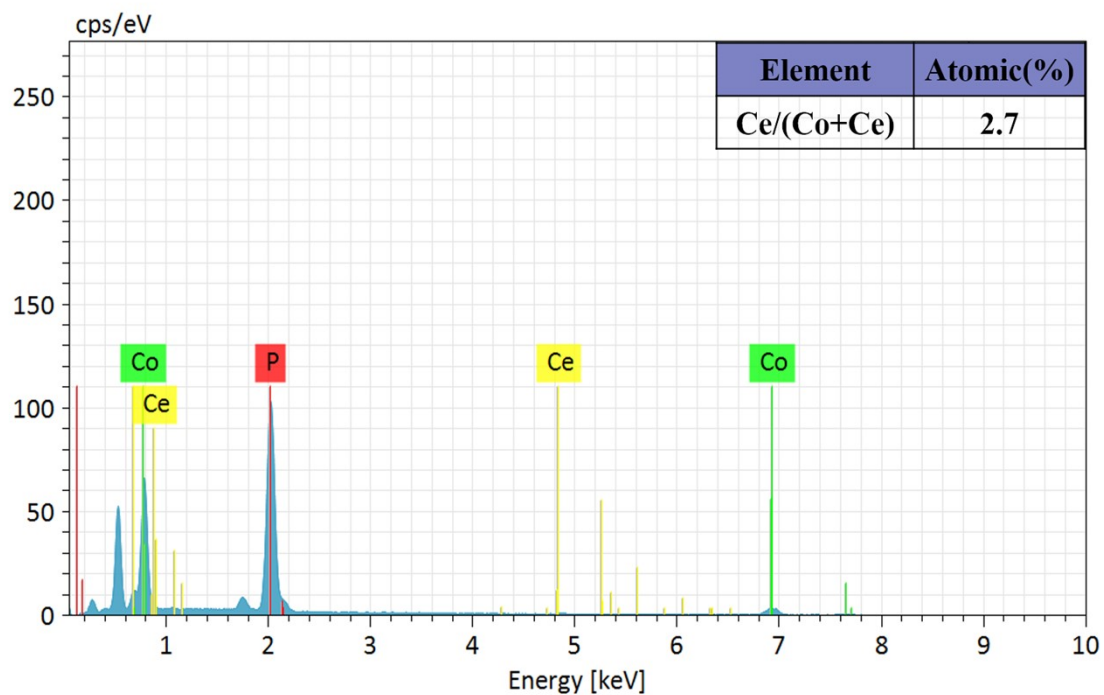

**Fig. S3** EDX spectrum of Ce-CoP nanosheets which were synthesized from the precursor obtained after microwave heating 1 mL ChCl/OA DES with 1.6 mg  $\text{Ce}(\text{NO}_3)_3$  and 30 mg  $\text{CoCl}_2$ .

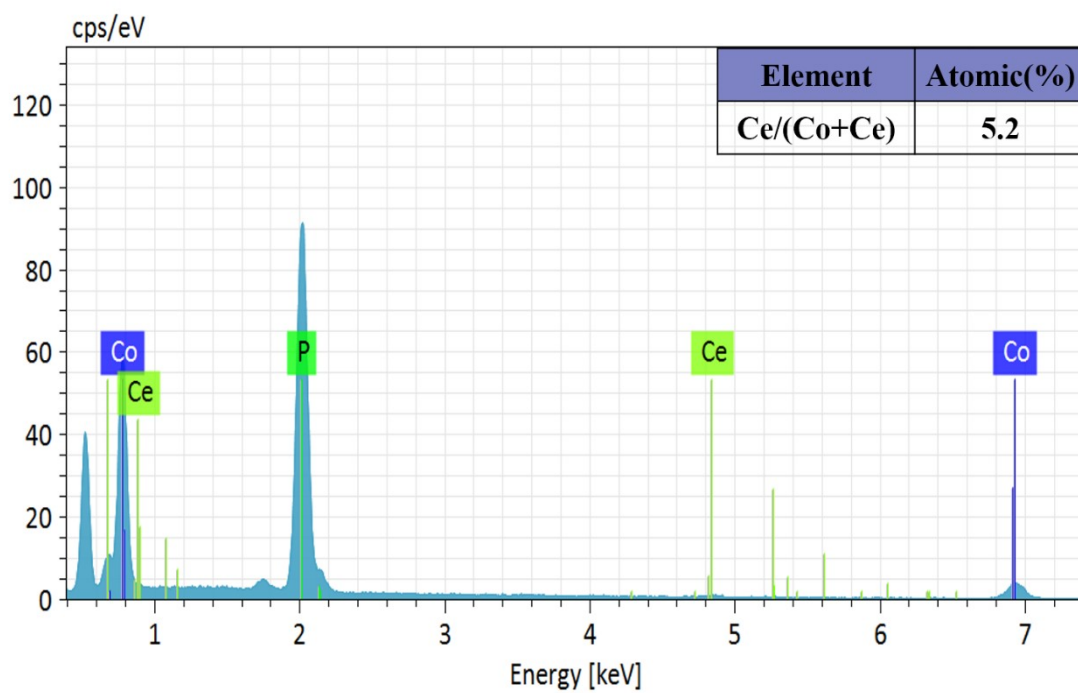

**Fig. S4** EDX spectrum of Ce-CoP nanosheets which were synthesized from the precursor obtained after microwave heating 1 mL ChCl/OA DES with 6.09 mg  $\text{Ce}(\text{NO}_3)_3$  and 30 mg  $\text{CoCl}_2$ .

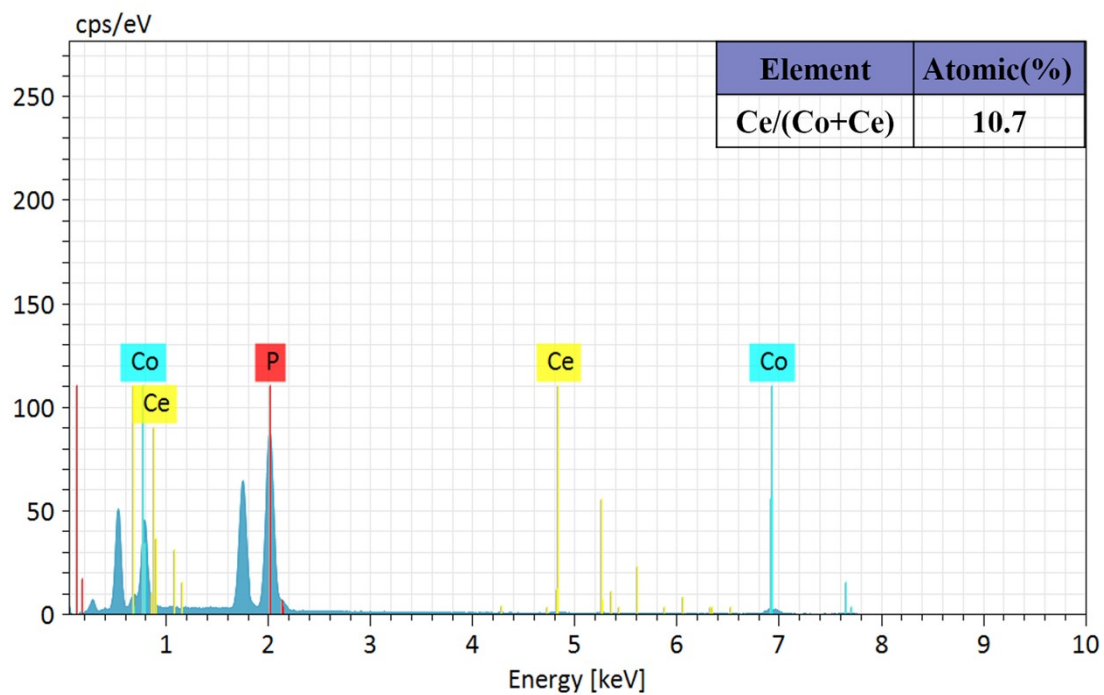

**Fig. S5** EDX spectrum of Ce-CoP nanosheets which were synthesized from the precursor obtained after microwave heating 1 mL ChCl/OA DES with 9.65 mg  $\text{Ce}(\text{NO}_3)_3$  and 30 mg  $\text{CoCl}_2$ .

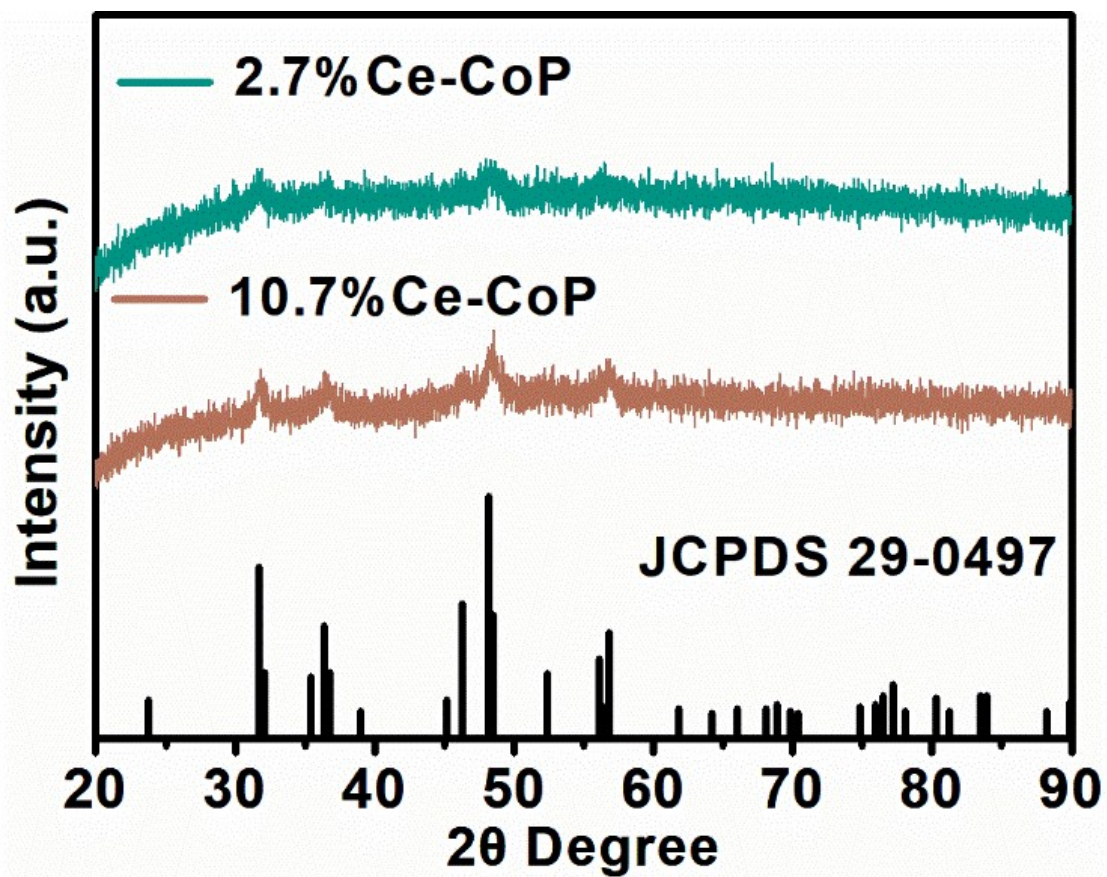

Fig. S6 XRD patterns of 2.7%Ce-CoP nanosheets and 10.7%Ce-CoP nanosheets.

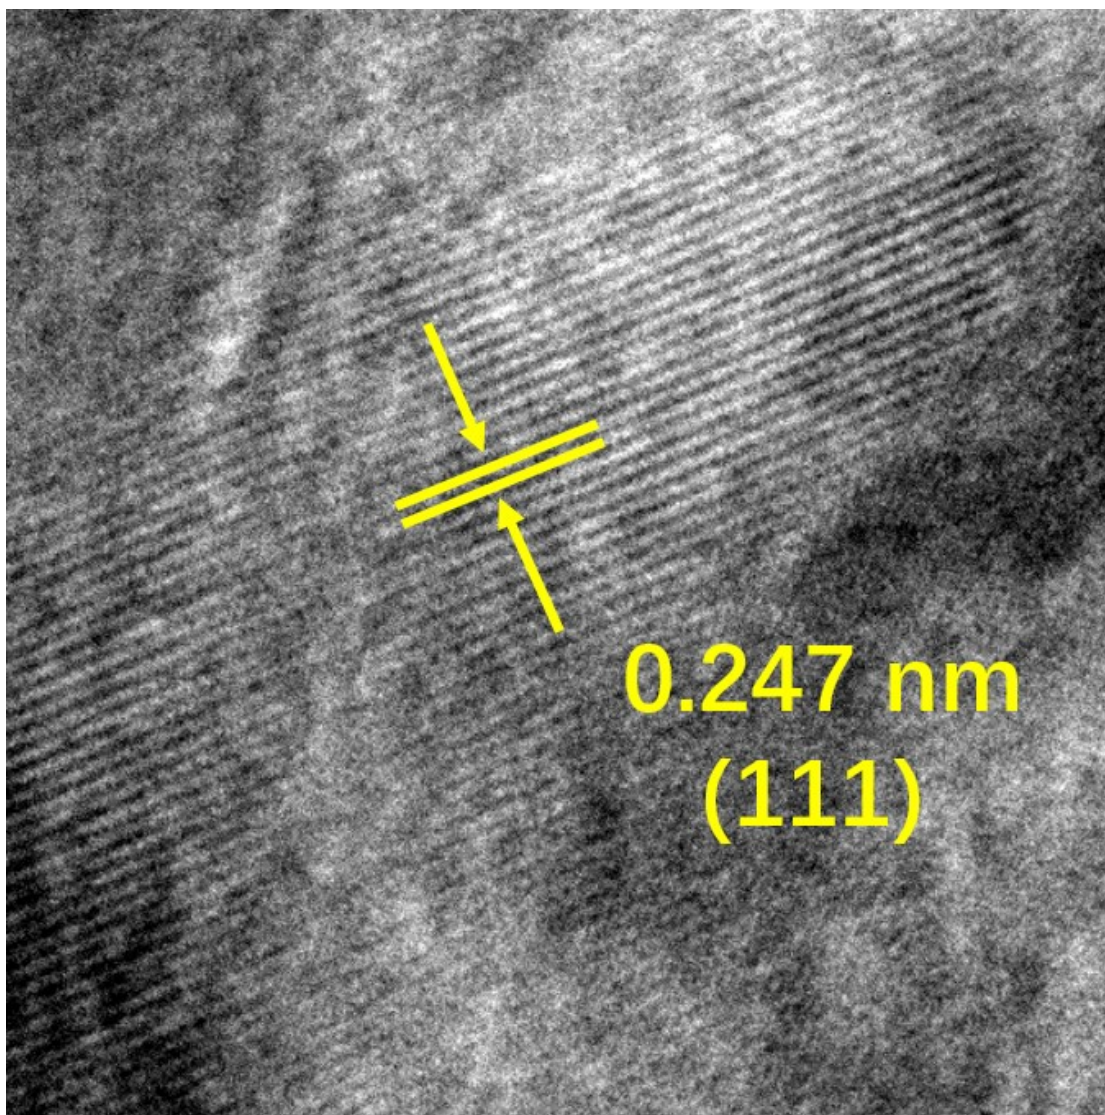

**Fig. S7** HRTEM images of CoP nanosheets.

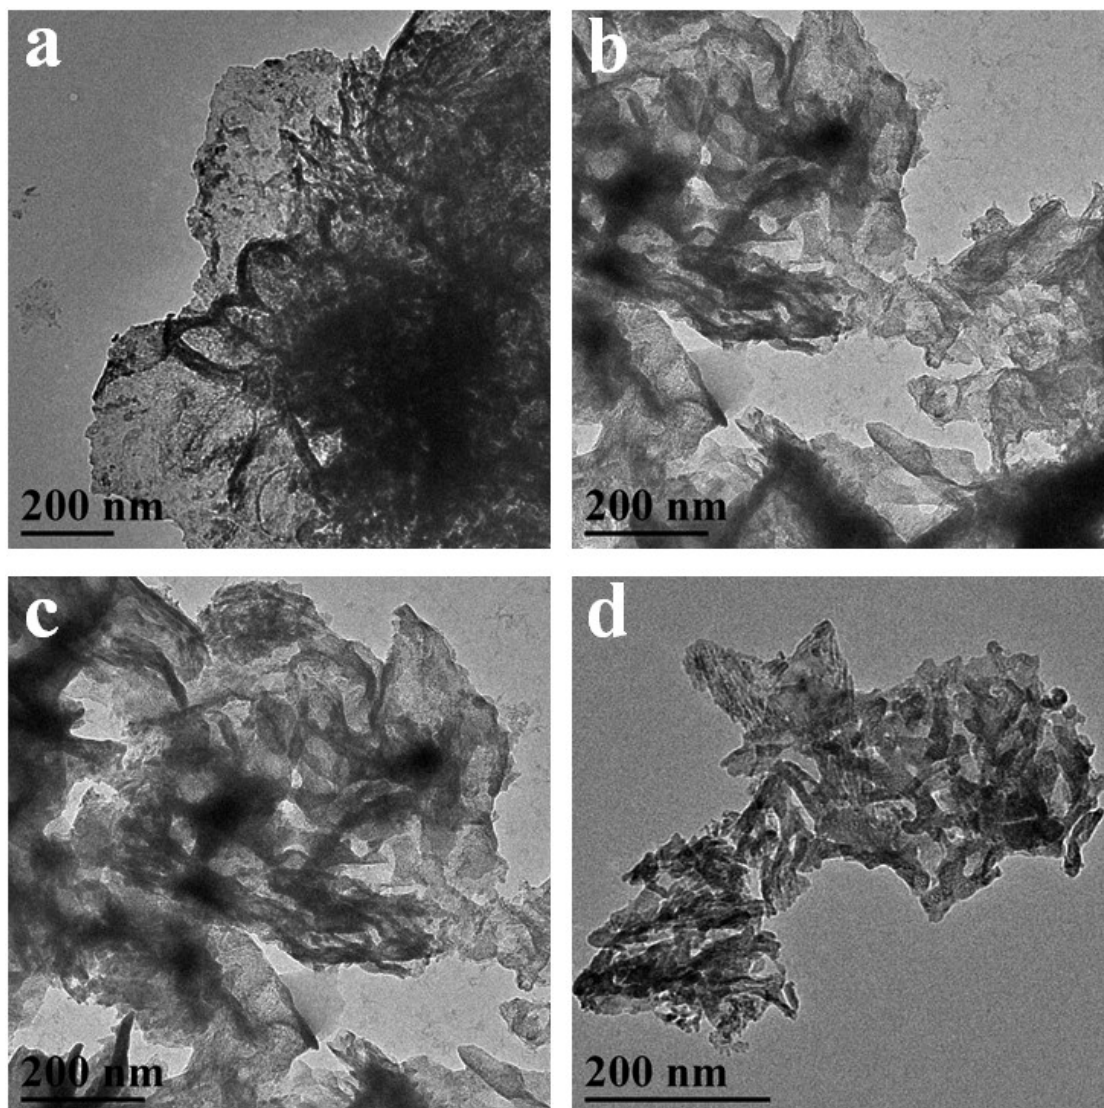

**Fig. S8** TEM images of (a) CoP nanosheets, (b, c) 2.7%Ce-CoP nanosheets, (d) 10.7%Ce-CoP nanosheets.

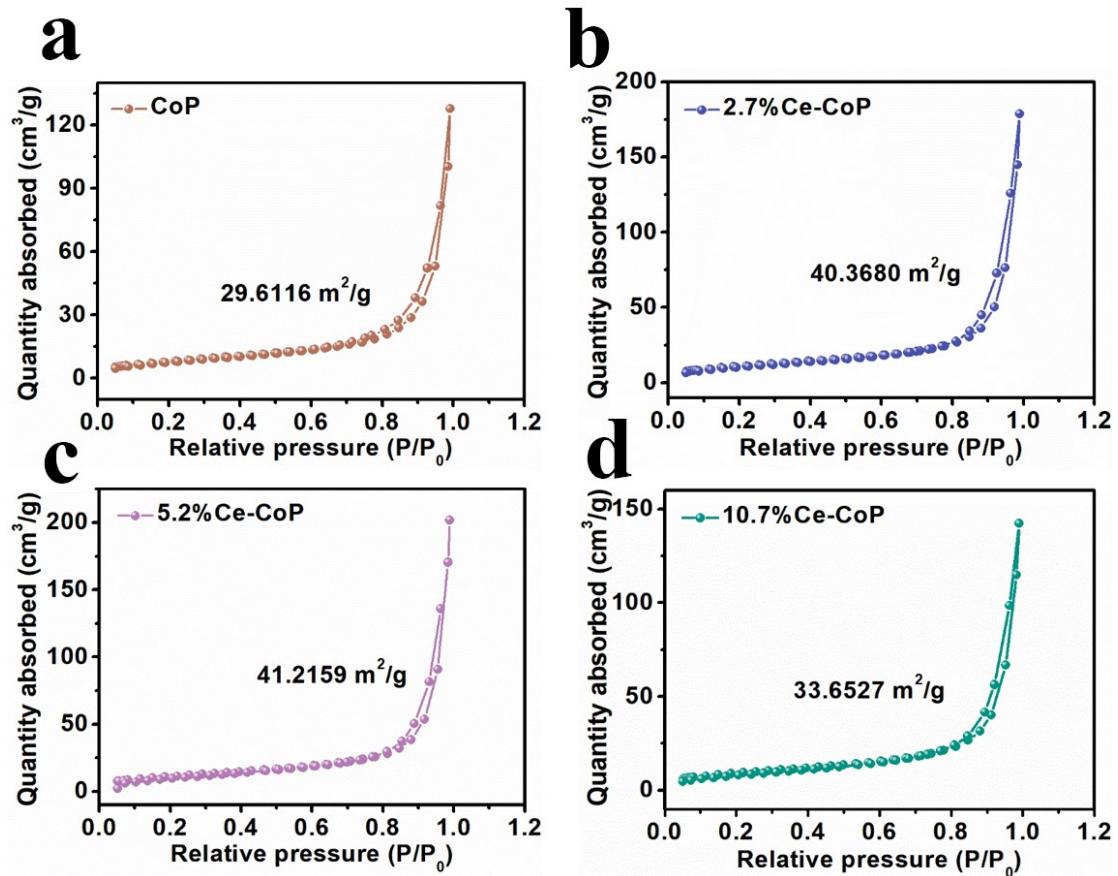

**Fig. S9**  $N_2$  adsorption-desorption isotherms of (a) CoP nanosheets, (b) 2.7%Ce-CoP nanosheets, (c) 5.2%Ce-CoP nanosheets and (d) 10.7%Ce-CoP nanosheets.

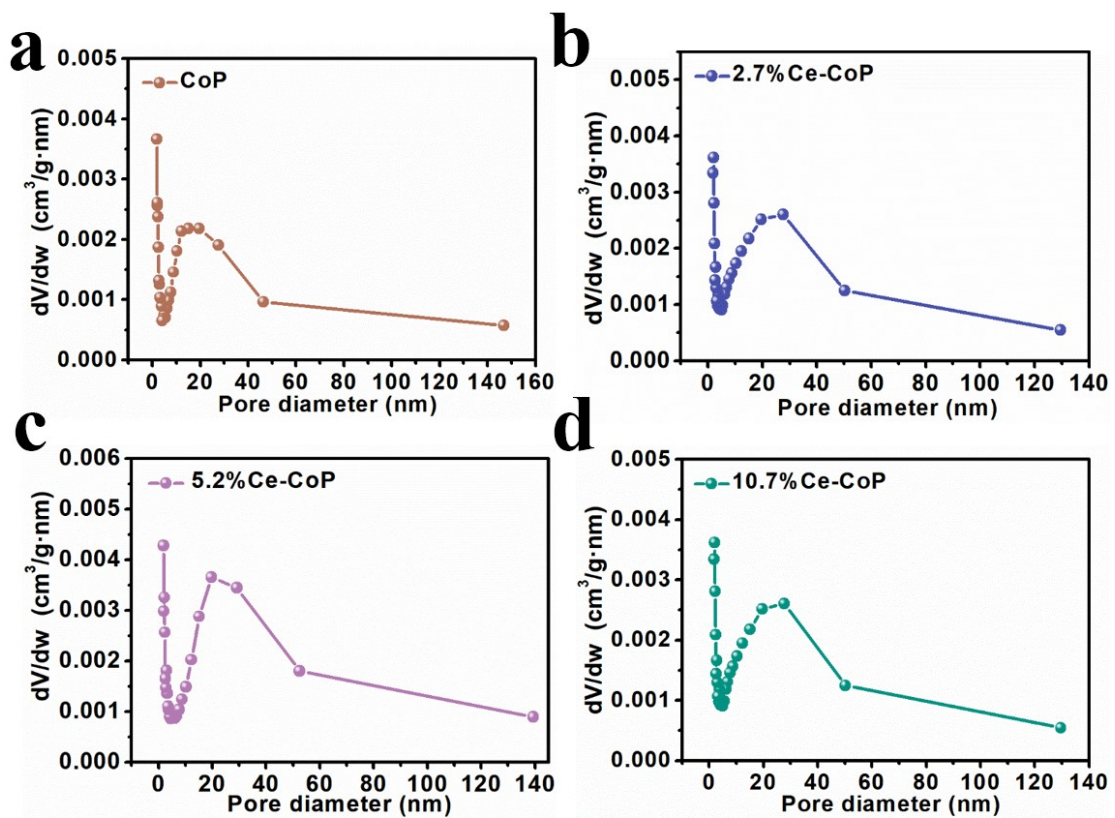

**Fig. S10** Pore size distributions of (a) CoP nanosheets, (b) 2.7%Ce-CoP nanosheets, (c) 5.2%Ce-CoP nanosheets and (d) 10.7%Ce-CoP nanosheets.



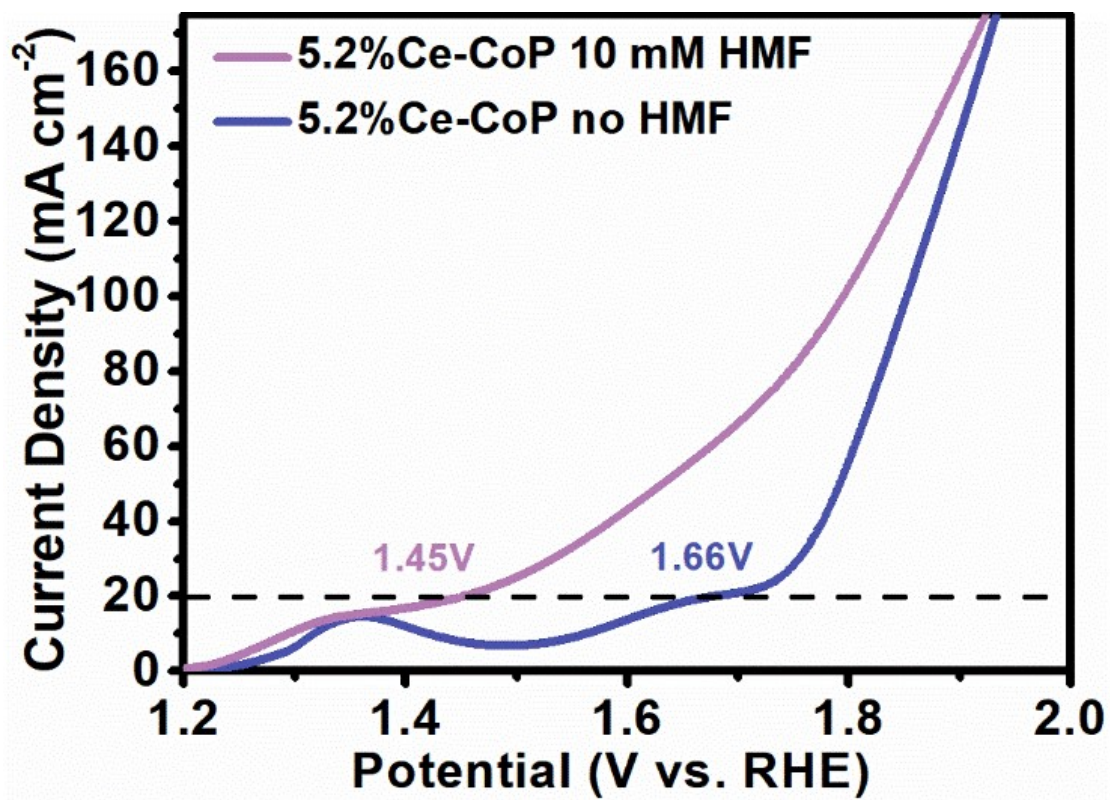

Fig. S11 LSV curves of 5.2%Ce-CoP nanosheets in 1 M KOH with/without HMF.

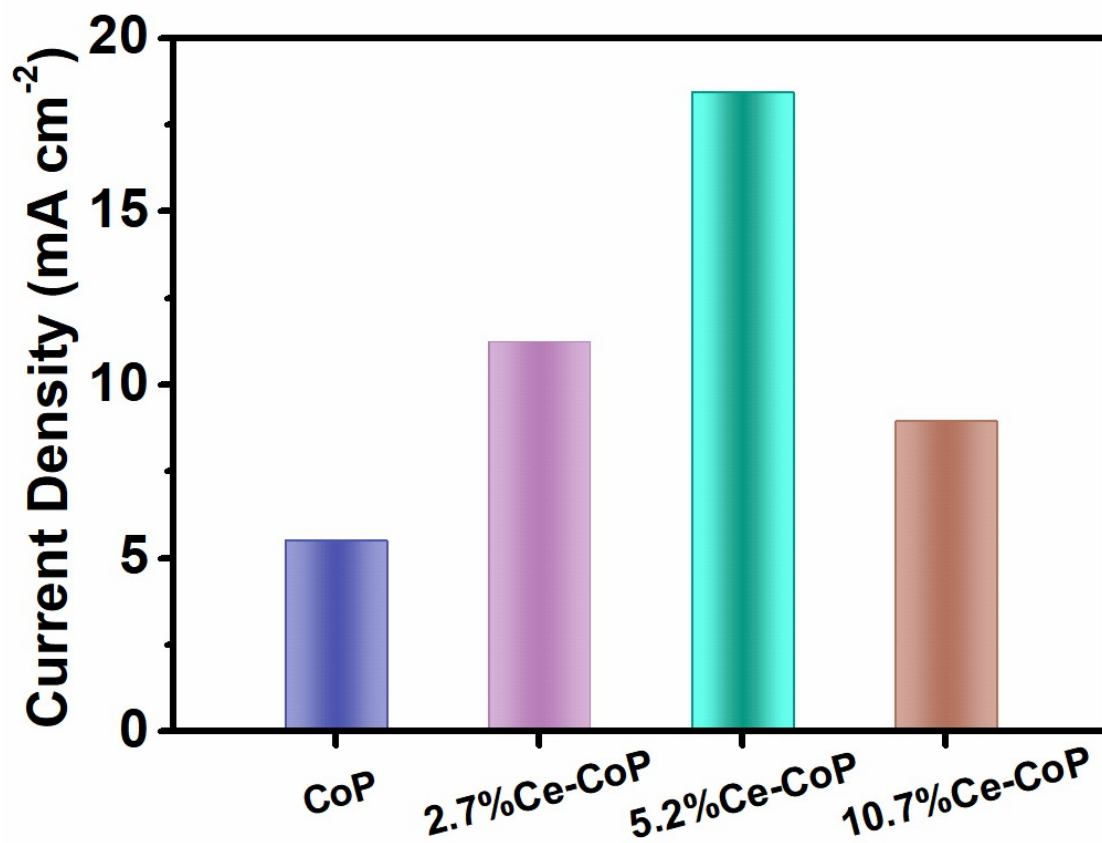

Fig. S12 Corresponding current densities at 1.44 V in 1 M KOH with 10 mM HMF.

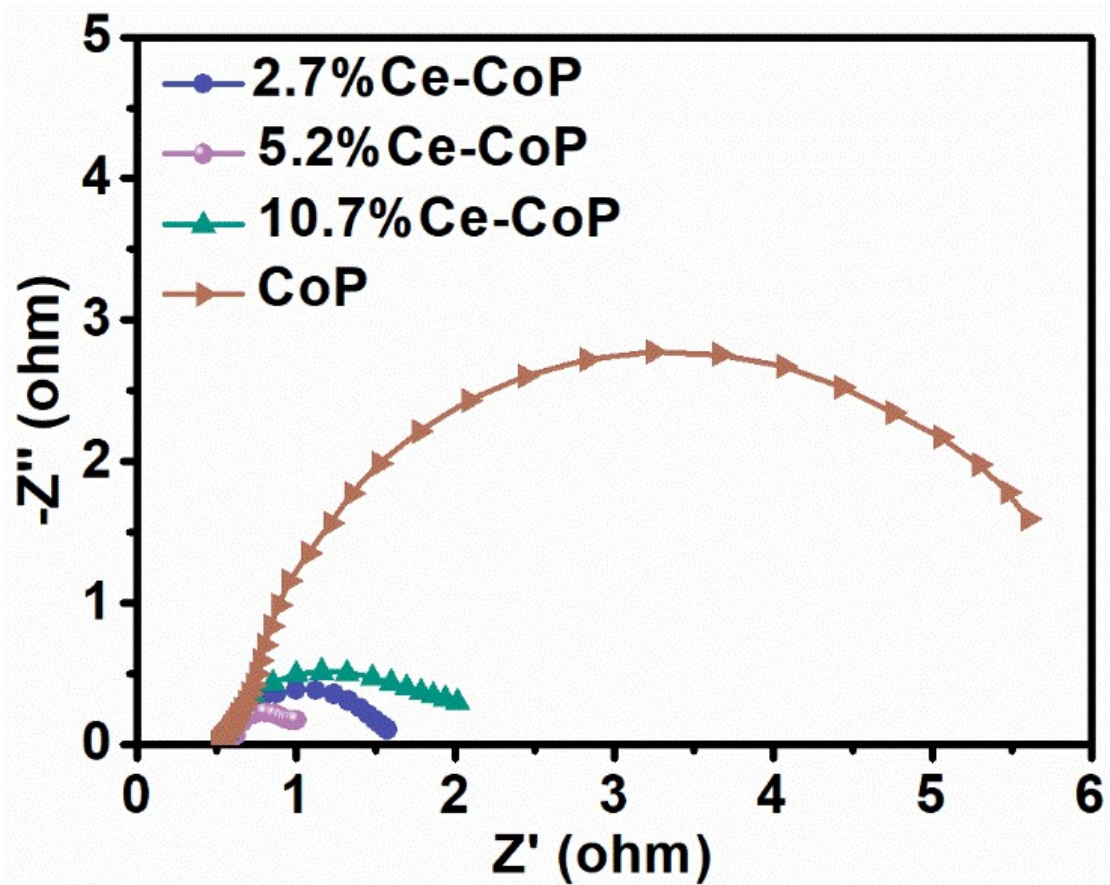

Fig. S13 Nyquist plots of different samples at 1.44 V.

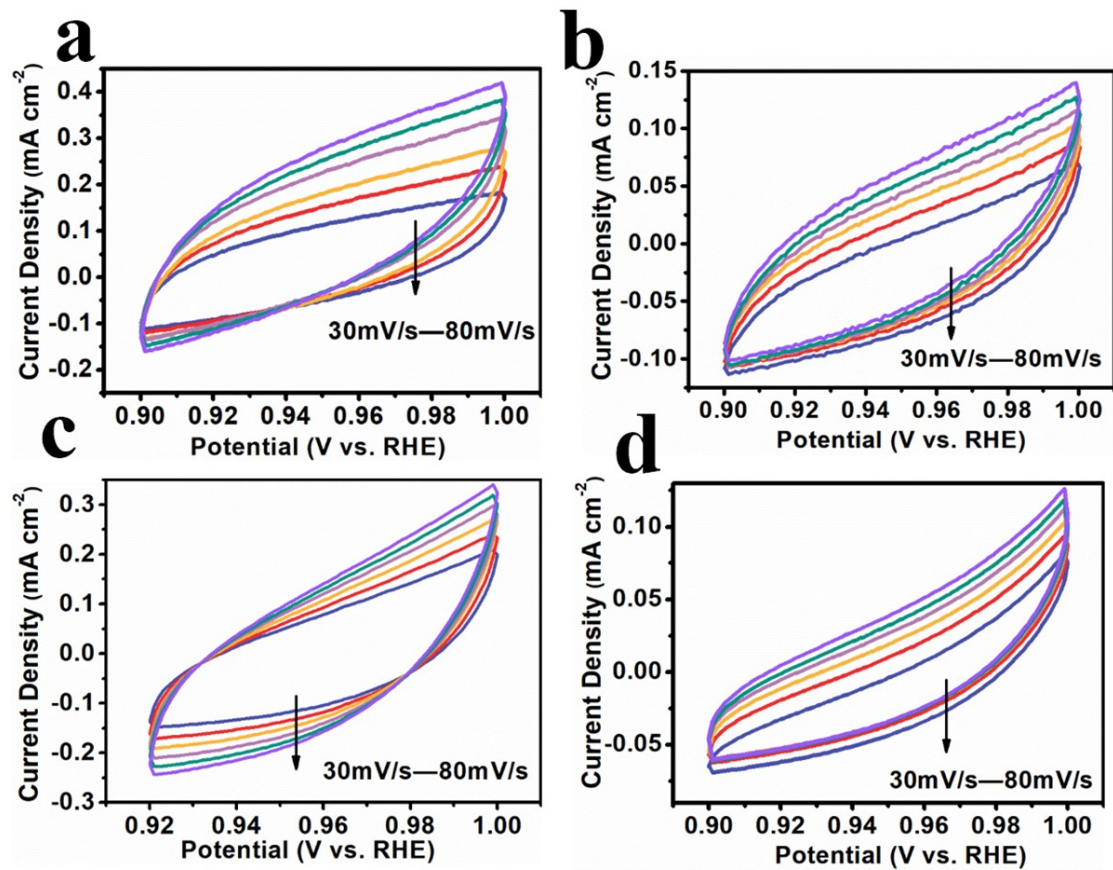

**Fig. S14** CV curves of (a) CoP nanosheets, (b) 2.7%Ce-CoP nanosheets, (c) 5.2%Ce-CoP nanosheets and (d) 10.7%Ce-CoP nanosheets at different scan rates.

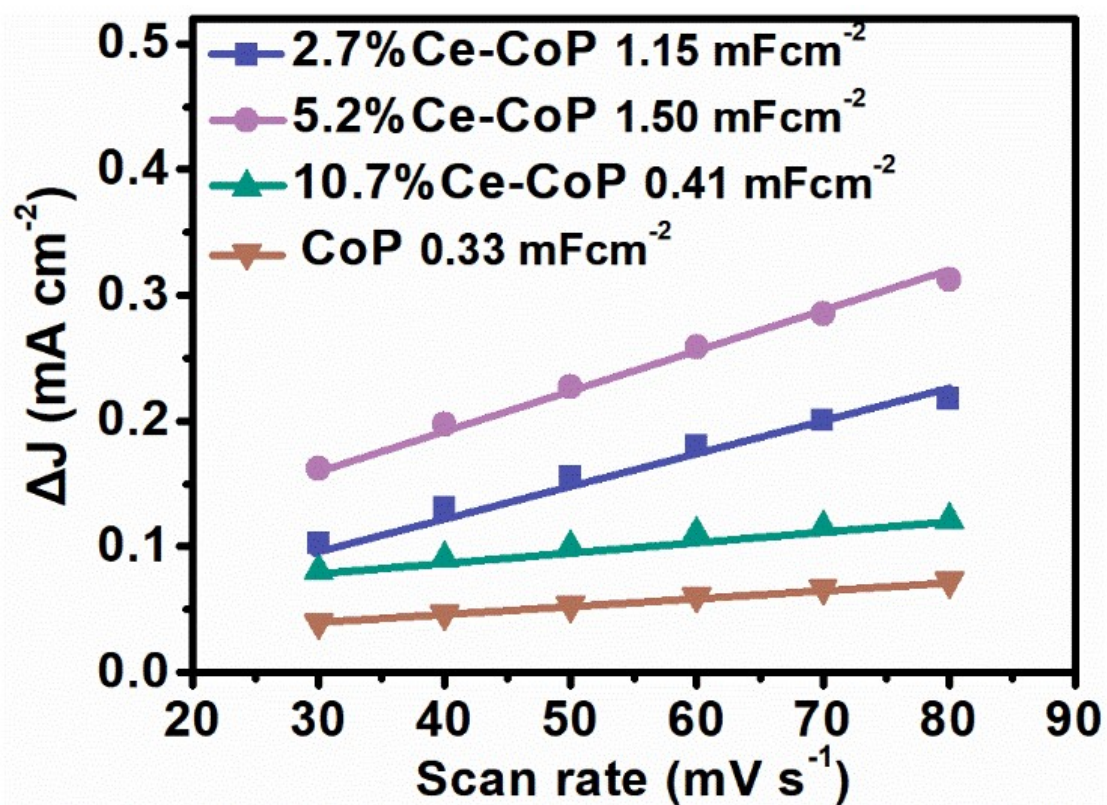

Fig. S15 The corresponding  $C_{dl}$  of CoP nanosheets, 2.7%Ce-CoP nanosheets, 5.2%Ce-CoP nanosheets and 10.7%Ce-CoP nanosheets in 1.0 M KOH with 10 mM HMF.

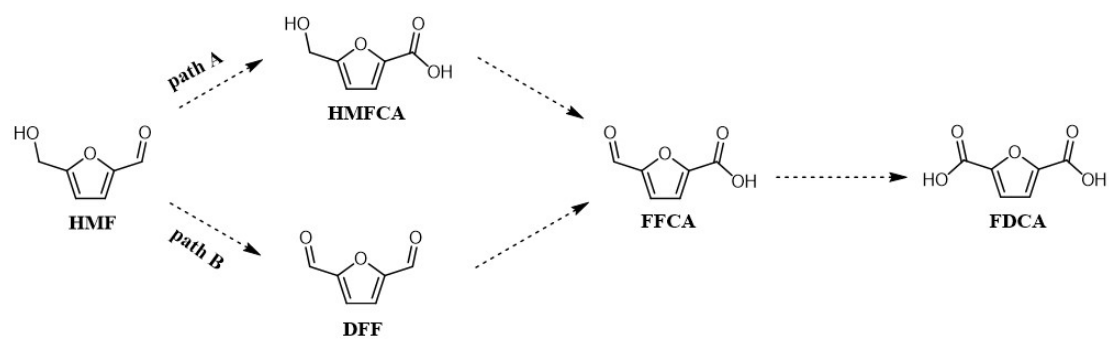

**Fig. S16** Two possible pathways of HMF oxidation to FDCA.

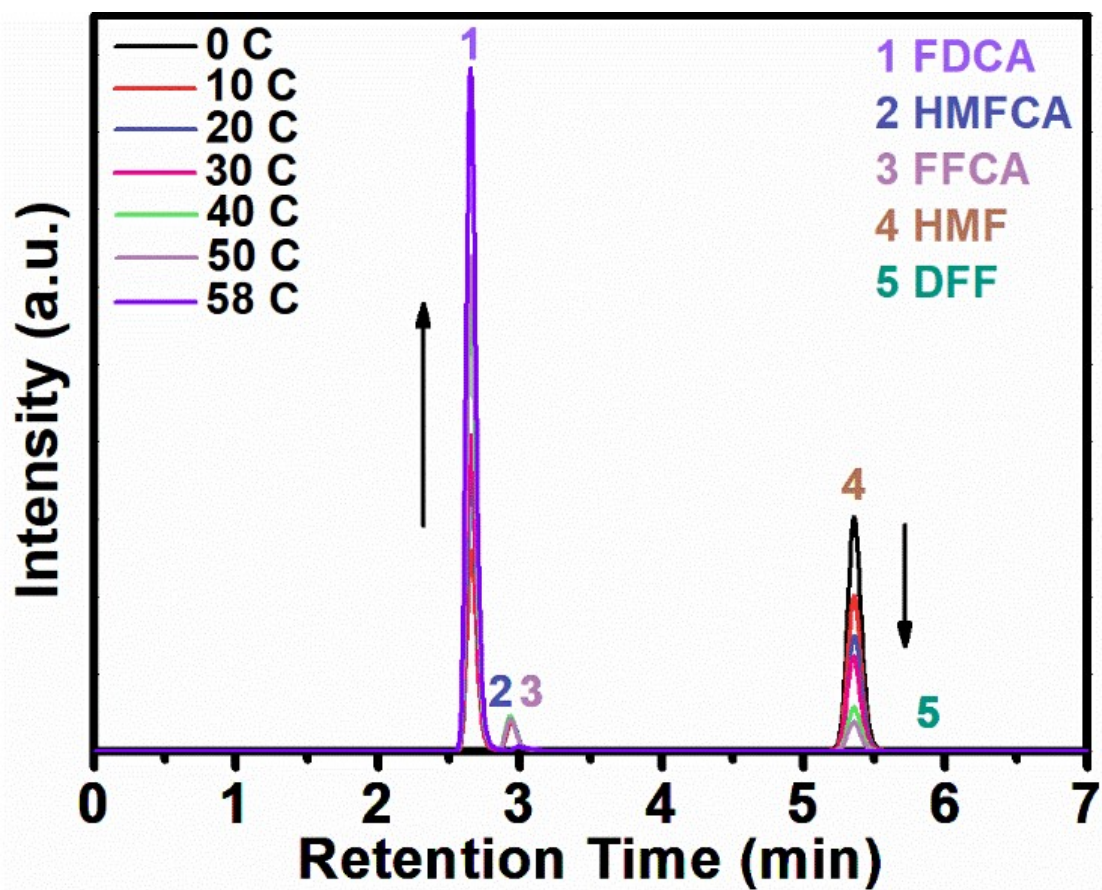

Fig. S17 HPLC traces of electrocatalytic oxidation of HMF by 5.2%Ce-CoP nanosheets at 1.44 V in 10 mL of 1 M KOH with 10 mM HMF.

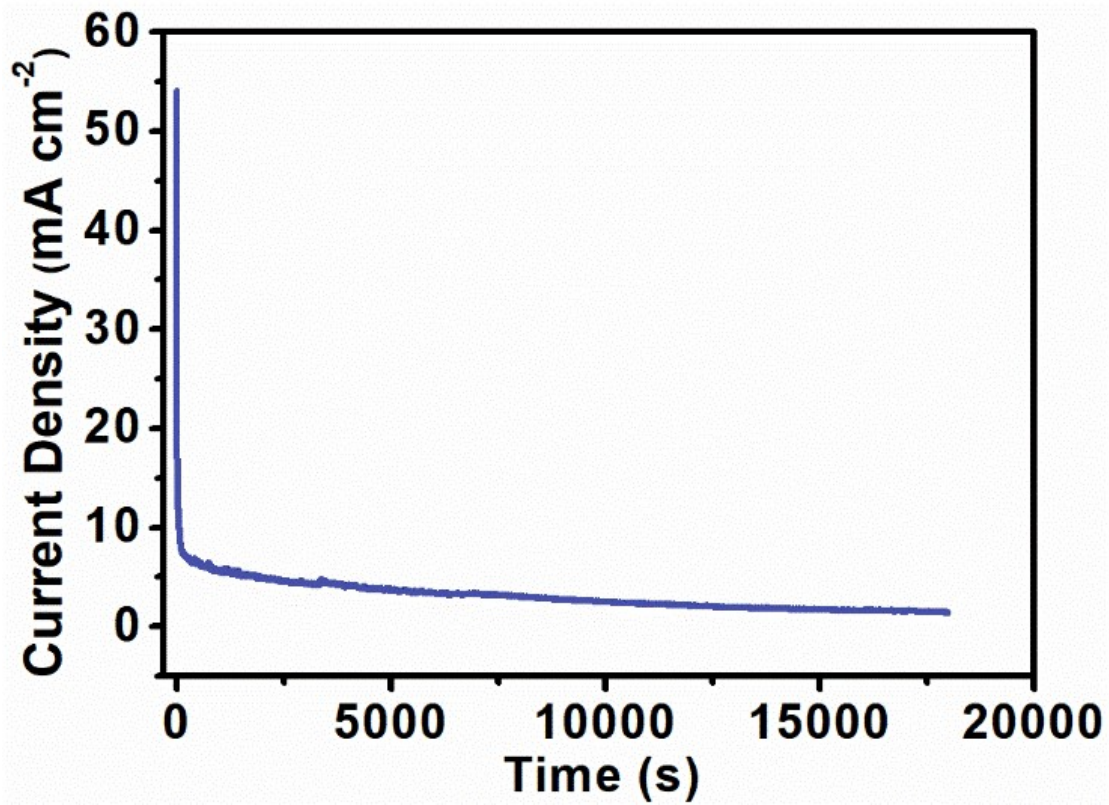

Fig. S18 I-t curve of 5.2%Ce-CoP nanosheets at a constant potential of 1.44 V in 1.0 M KOH with 10 mM HMF.



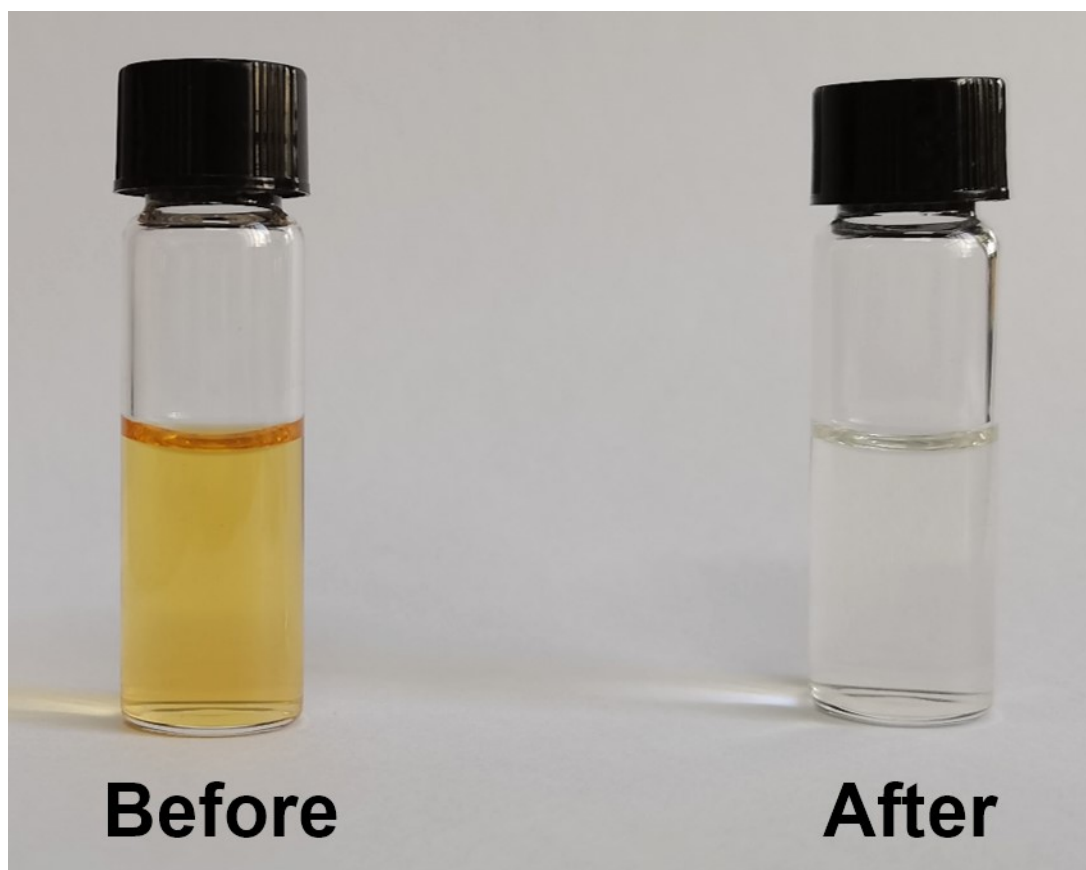

**Fig. S19** Color change of the recovered electrolyte before and after reaction.

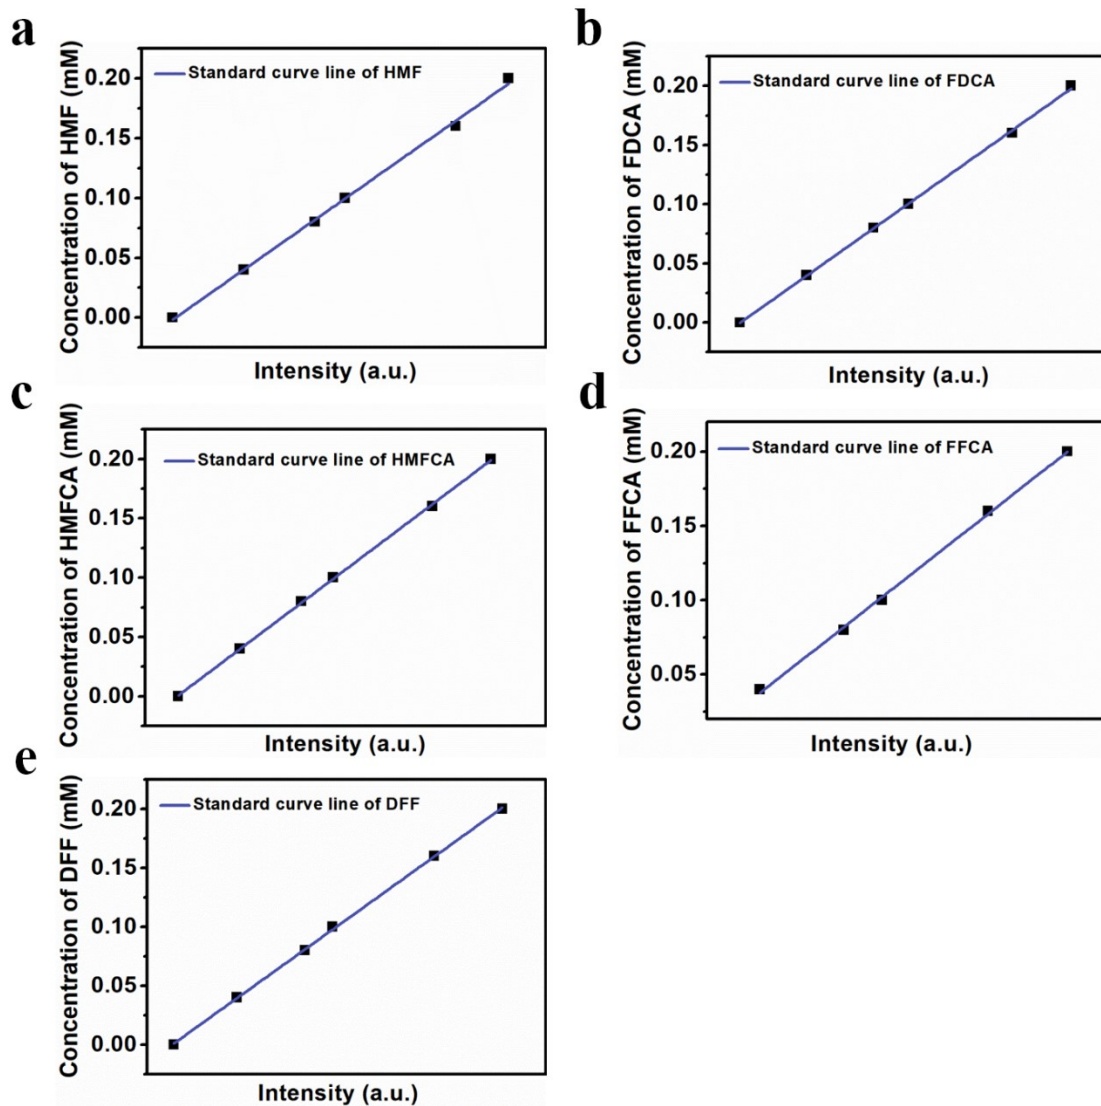

**Fig. S20** Calibration curves of the HPLC for (a) HMF, (b) FDCA, (c) HMFCA, (d) FFCA and (e) DFF.

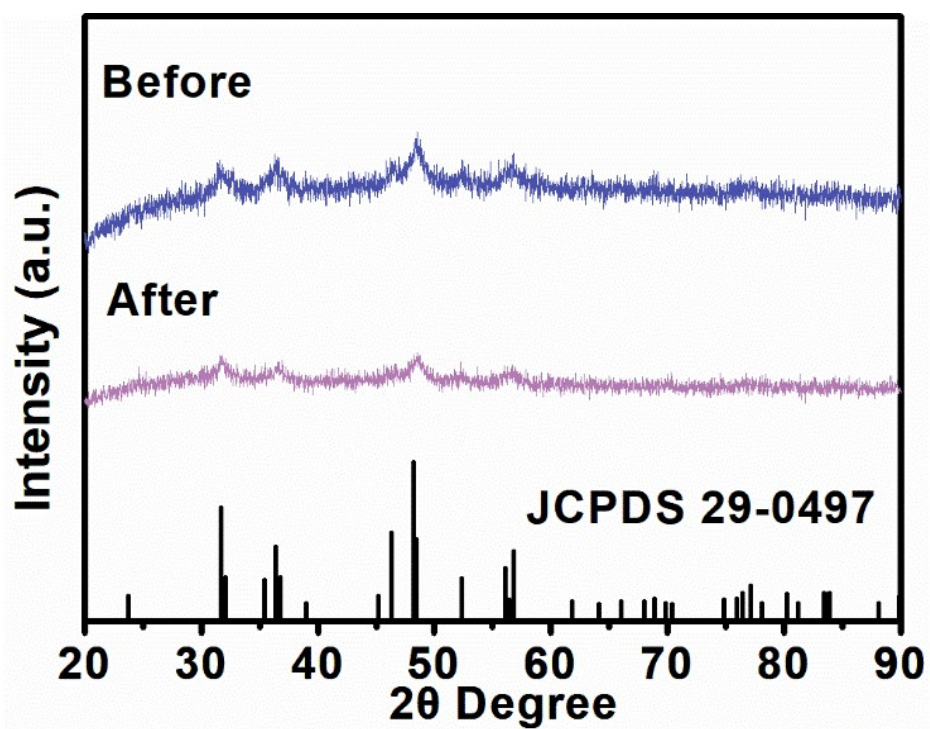

Fig. S21 XRD patterns of 5.2%Ce-CoP nanosheets before and after four electrolysis cycles.

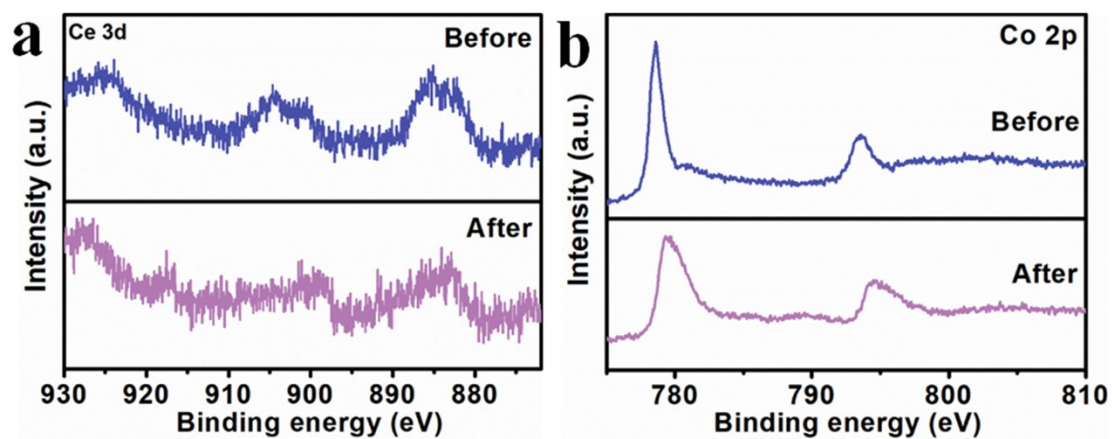

**Fig. S22** XPS spectra of 5.2%Ce-CoP nanosheets before and after four electrolysis cycles. (a) Ce 3d, (b) Co 2p.

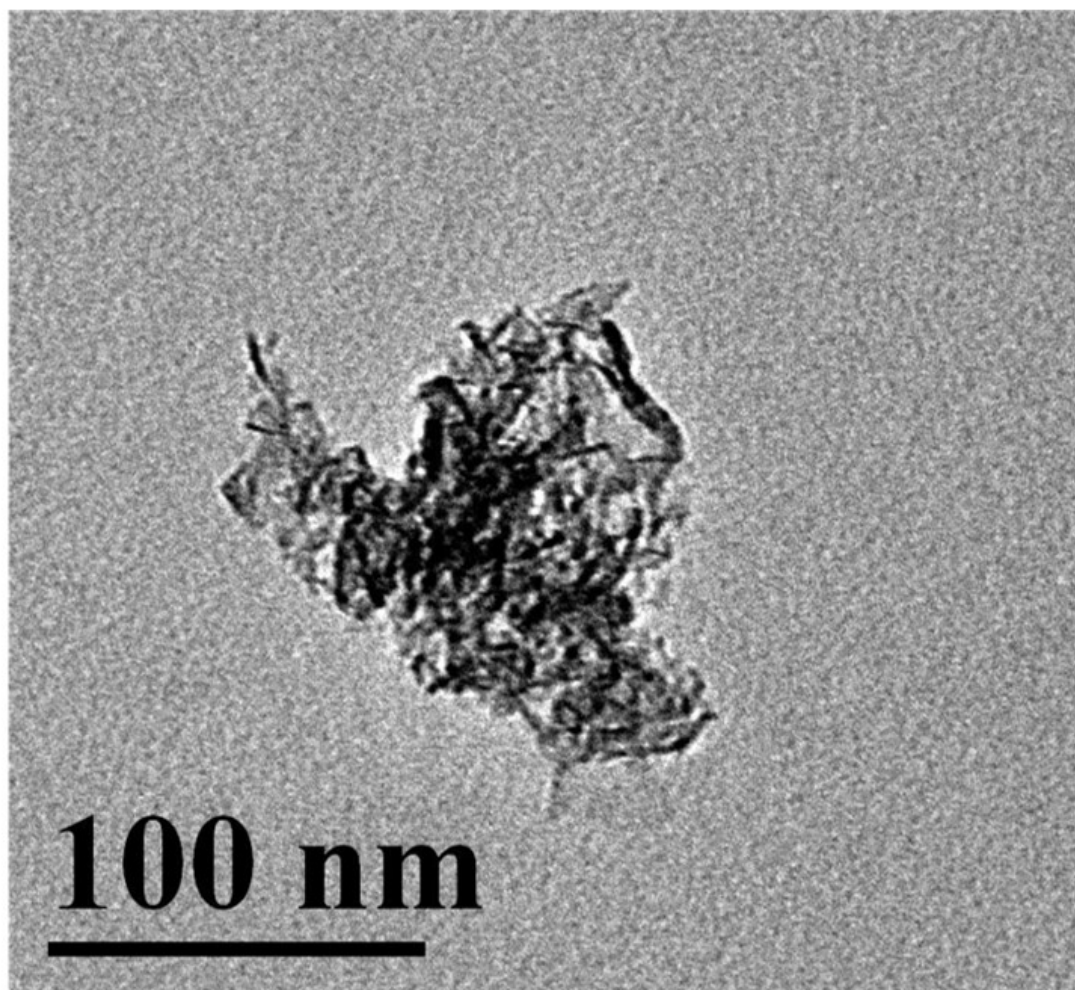

**Fig. S23** TEM images of 5.2%Ce-CoP nanosheets after four electrolysis cycles.

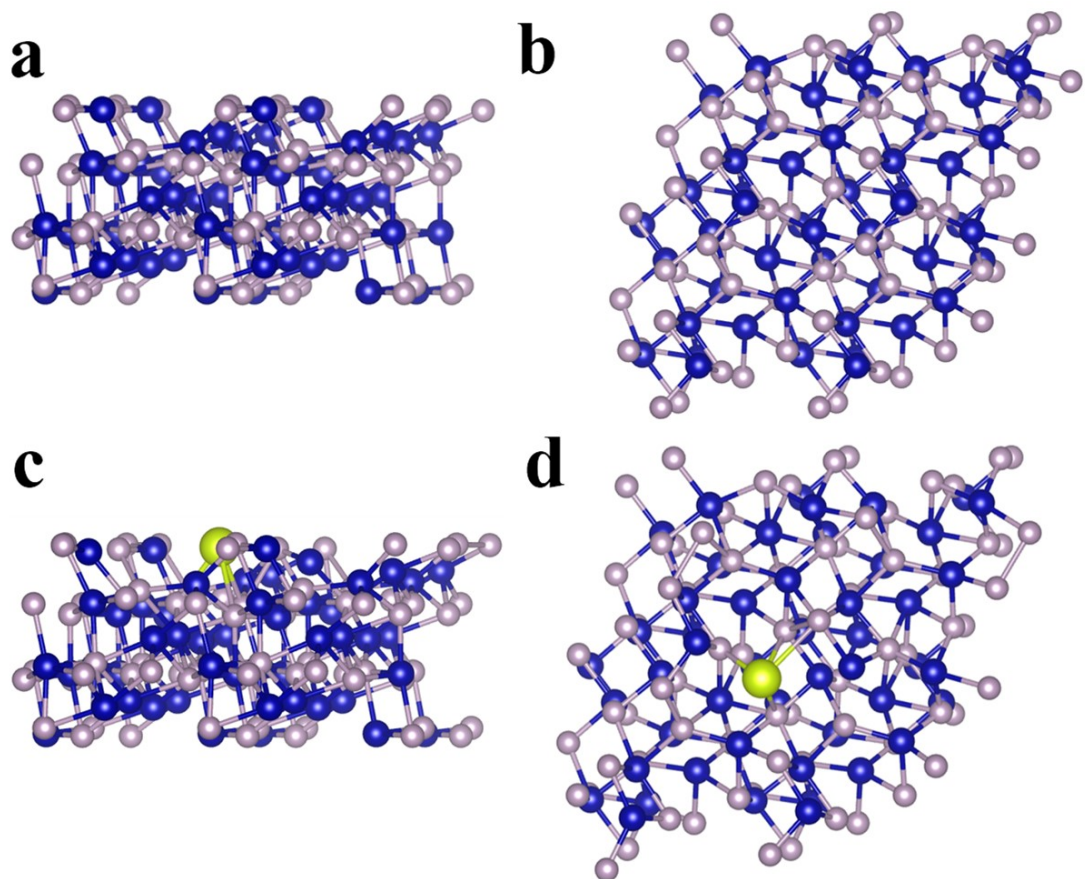

**Fig. S24** Optimized structure of (a, b) CoP and (c, d) 5.2%Ce-CoP.

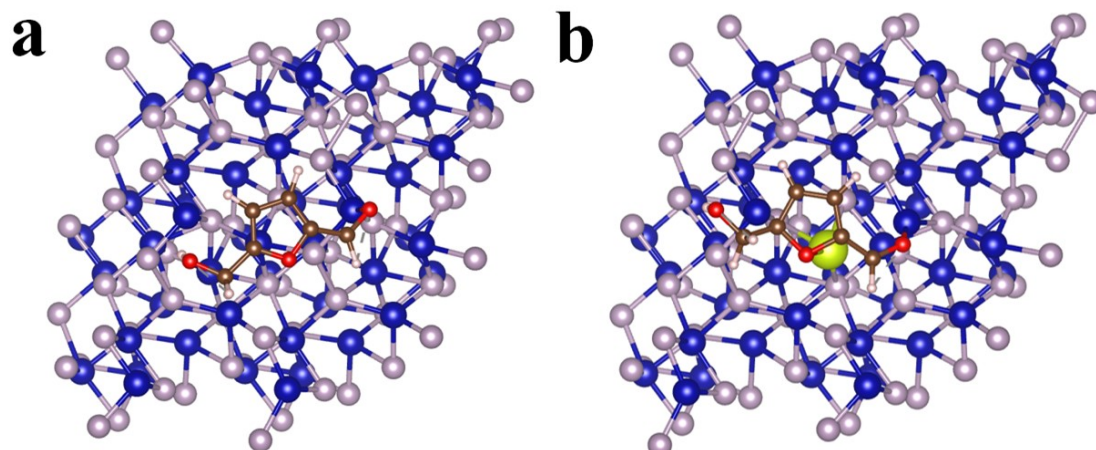

**Fig. S25** Optimized structure of HMF on (a) CoP and (b) 5.2%Ce-CoP.

Table S1 Recently reported high performance electrocatalytic HMF-EOR catalysts.

| Catalysts                                                           | C <sub>HMF</sub><br>(mM) | Potential<br>(V vs. RHE) | Conv.<br>(%) | FDCA Yield<br>(%) | FE.<br>(%)  |
|---------------------------------------------------------------------|--------------------------|--------------------------|--------------|-------------------|-------------|
| Co-P/CF <sup>4</sup>                                                | 50                       | 1.423                    | 100          | 90                | ~           |
| Co-P_DES <sup>5</sup>                                               | 5                        | 1.45                     | 99           | 85.3              | 77.3        |
| NiCoFe-LDH <sup>6</sup>                                             | 10                       | 1.55                     | 95.5         | 84.9              | ~           |
| NiCo <sub>2</sub> O <sub>4</sub> <sup>7</sup>                       | 5                        | 1.5                      | 99.6         | 90.8              | 87.5        |
| NiCoP <sup>8</sup>                                                  | 300                      | 1.464                    | 99.8         | 99.6              | 96.1        |
| CuCo <sub>2</sub> O <sub>4</sub> <sup>9</sup>                       | ~                        | 1.45                     | ~            | 93.7              | 94          |
| nanocrystalline Cu <sup>10</sup>                                    | 5                        | 1.62                     | 99.9         | 96.4              | 95.3        |
| CuNi(OH) <sub>2</sub> <sup>11</sup>                                 | 5                        | 1.45                     | 100          | 93.3              | 94.4        |
| NiCoFe-LDHs <sup>12</sup>                                           | 10                       | 1.54                     | 95.5         | 84.9              | ~           |
| Ni <sub>0.9</sub> Cu <sub>0.1</sub> (OH) <sub>2</sub> <sup>13</sup> | 5                        | 1.45                     | ~99          | 91.2              | ~           |
| VN/NiF <sup>14</sup>                                                | 10                       | ~                        | 99           | 97                | ~           |
| N-MoO <sub>2</sub> /Ni <sub>3</sub> S <sub>2</sub> NF <sup>15</sup> | 10                       | 1.623                    | 96           | 90                | ~           |
| <b>5.2%Ce-CoP<br/>(This work)</b>                                   | <b>10</b>                | <b>1.44</b>              | <b>100</b>   | <b>98</b>         | <b>96.4</b> |



Table S2 Adsorption energy of HMF on different surfaces

| <b>Adsorbed sites</b> | <b><math>E_{total}</math></b> | <b><math>E_{sub}</math></b> | <b><math>E_{mol}</math></b> | <b><math>E_{ads}</math></b> |
|-----------------------|-------------------------------|-----------------------------|-----------------------------|-----------------------------|
| CoP                   | -742.055                      | -645.359                    | -95.2825                    | -1.41298                    |
| Ce-CoP                | -737.895                      | -640.408                    | -95.2825                    | -2.20414                    |

\* Where the  $E_{total}$  is the total energy of the HMF adsorbed on the CoP or Ce-CoP substrate,  $E_{mol}$  and  $E_{sub}$  are the energies of the isolated HMF molecule and the substrate, respectively.

Table S3 Unit-cell and position parameters of CoP optimization model

| <b>CoP</b>                  |                       |                       |                       |
|-----------------------------|-----------------------|-----------------------|-----------------------|
| $a$ (Å)                     | 12.06880              |                       |                       |
| $b$ (Å)                     | 12.89130              |                       |                       |
| $c$ (Å)                     | 22.27670              |                       |                       |
| $\alpha$ (deg)              | 90.0                  |                       |                       |
| $\beta$ (deg)               | 90.0                  |                       |                       |
| $\gamma$ (deg)              | 74.0                  |                       |                       |
| <b>Atom<br/>Coordinates</b> | <b><math>x</math></b> | <b><math>y</math></b> | <b><math>z</math></b> |
| Co1                         | 0.02027               | 0.06166               | 0.45061               |
| Co2                         | 0.40216               | 0.46033               | 0.34022               |
| Co3                         | 0.13718               | 0.15573               | 0.55414               |
| Co4                         | 0.00837               | 0.3514                | 0.43866               |
| Co5                         | 0.12752               | 0.44011               | 0.53768               |
| Co6                         | 0.20593               | 0.02834               | 0.64384               |
| Co7                         | 0.19848               | 0.0525                | 0.38365               |
| Co8                         | 0.31931               | 0.14703               | 0.49419               |
| Co9                         | 0.42555               | 0.22926               | 0.58801               |
| Co10                        | 0.21205               | 0.25923               | 0.39522               |
| Co11                        | 0.32779               | 0.35775               | 0.50163               |
| Co12                        | 0.44996               | 0.44018               | 0.60447               |
| Co13                        | 0.52026               | 0.06167               | 0.45061               |
| Co14                        | 0.90216               | 0.46033               | 0.34022               |
| Co15                        | 0.63718               | 0.15572               | 0.55413               |
| Co16                        | 0.50837               | 0.3514                | 0.43866               |
| Co17                        | 0.62751               | 0.44012               | 0.53769               |
| Co18                        | 0.70595               | 0.02837               | 0.64386               |
| Co19                        | 0.69848               | 0.0525                | 0.38365               |
| Co20                        | 0.81931               | 0.14702               | 0.49419               |
| Co21                        | 0.92554               | 0.22925               | 0.588                 |
| Co22                        | 0.71205               | 0.25923               | 0.39522               |
| Co23                        | 0.82778               | 0.35774               | 0.50162               |
| Co24                        | 0.94996               | 0.44019               | 0.60447               |

---

|      |         |         |         |
|------|---------|---------|---------|
| Co25 | 0.02027 | 0.56167 | 0.45061 |
| Co26 | 0.40216 | 0.96033 | 0.34022 |
| Co27 | 0.13718 | 0.65572 | 0.55413 |
| Co28 | 0.00837 | 0.8514  | 0.43866 |
| Co29 | 0.12752 | 0.94013 | 0.5377  |
| Co30 | 0.20597 | 0.52835 | 0.64385 |
| Co31 | 0.19848 | 0.5525  | 0.38365 |
| Co32 | 0.31931 | 0.64702 | 0.49419 |
| Co33 | 0.42555 | 0.72924 | 0.58801 |
| Co34 | 0.21205 | 0.75923 | 0.39522 |
| Co35 | 0.32778 | 0.85776 | 0.50163 |
| Co36 | 0.44997 | 0.94018 | 0.60447 |
| Co37 | 0.52027 | 0.56166 | 0.45061 |
| Co38 | 0.90216 | 0.96033 | 0.34022 |
| Co39 | 0.63718 | 0.65571 | 0.55413 |
| Co40 | 0.50837 | 0.8514  | 0.43866 |
| Co41 | 0.62751 | 0.9401  | 0.53769 |
| Co42 | 0.70594 | 0.52836 | 0.64384 |
| Co43 | 0.69848 | 0.5525  | 0.38365 |
| Co44 | 0.81931 | 0.64703 | 0.49419 |
| Co45 | 0.92555 | 0.72925 | 0.58801 |
| Co46 | 0.71205 | 0.75923 | 0.39522 |
| Co47 | 0.8278  | 0.85775 | 0.50163 |
| Co48 | 0.94996 | 0.94019 | 0.60447 |
| P1   | 0.40211 | 0.23206 | 0.42916 |
| P2   | 0.01638 | 0.32106 | 0.53569 |
| P3   | 0.12607 | 0.40019 | 0.64234 |
| P4   | 0.00842 | 0.07968 | 0.34972 |
| P5   | 0.1335  | 0.17404 | 0.45535 |
| P6   | 0.23801 | 0.27684 | 0.57575 |
| P7   | 0.05349 | 0.31808 | 0.33667 |
| P8   | 0.17495 | 0.41676 | 0.43746 |
| P9   | 0.28534 | 0.00919 | 0.55751 |
| P10  | 0.35704 | 0.49365 | 0.4422  |
| P11  | 0.47334 | 0.07397 | 0.5514  |

---

---

|     |         |         |         |
|-----|---------|---------|---------|
| P12 | 0.06163 | 0.16481 | 0.64951 |
| P13 | 0.90211 | 0.23206 | 0.42916 |
| P14 | 0.51637 | 0.32105 | 0.53568 |
| P15 | 0.62603 | 0.40019 | 0.64234 |
| P16 | 0.50842 | 0.07968 | 0.34972 |
| P17 | 0.6335  | 0.17404 | 0.45535 |
| P18 | 0.73801 | 0.27683 | 0.57574 |
| P19 | 0.55349 | 0.31808 | 0.33667 |
| P20 | 0.67495 | 0.41676 | 0.43745 |
| P21 | 0.78532 | 0.00915 | 0.55751 |
| P22 | 0.85704 | 0.49365 | 0.4422  |
| P23 | 0.97333 | 0.07397 | 0.5514  |
| P24 | 0.56166 | 0.16485 | 0.64951 |
| P25 | 0.40211 | 0.73206 | 0.42916 |
| P26 | 0.01638 | 0.82106 | 0.53569 |
| P27 | 0.12602 | 0.90016 | 0.64235 |
| P28 | 0.00842 | 0.57968 | 0.34972 |
| P29 | 0.1335  | 0.67404 | 0.45535 |
| P30 | 0.23802 | 0.77683 | 0.57575 |
| P31 | 0.05349 | 0.81808 | 0.33667 |
| P32 | 0.17495 | 0.91676 | 0.43746 |
| P33 | 0.28533 | 0.50916 | 0.5575  |
| P34 | 0.35704 | 0.99365 | 0.4422  |
| P35 | 0.47332 | 0.57399 | 0.55141 |
| P36 | 0.06168 | 0.66483 | 0.64951 |
| P37 | 0.90211 | 0.73206 | 0.42916 |
| P38 | 0.51639 | 0.82104 | 0.53569 |
| P39 | 0.62603 | 0.90019 | 0.64235 |
| P40 | 0.50842 | 0.57968 | 0.34972 |
| P41 | 0.63351 | 0.67403 | 0.45534 |
| P42 | 0.73801 | 0.77683 | 0.57575 |
| P43 | 0.55349 | 0.81808 | 0.33667 |
| P44 | 0.67496 | 0.91675 | 0.43745 |
| P45 | 0.78535 | 0.50916 | 0.5575  |
| P46 | 0.85704 | 0.99365 | 0.4422  |

---

|     |         |         |         |
|-----|---------|---------|---------|
| P47 | 0.97334 | 0.57397 | 0.55141 |
| P48 | 0.56166 | 0.66482 | 0.6495  |

Table S4 Unit-cell and position parameters of 5.2%Ce-CoP optimization model

---

**5.2%Ce-CoP**

---

|                |          |
|----------------|----------|
| $a$ (Å)        | 12.06880 |
| $b$ (Å)        | 12.89130 |
| $c$ (Å)        | 22.27670 |
| $\alpha$ (deg) | 90.0     |
| $\beta$ (deg)  | 90.0     |
| $\gamma$ (deg) | 74.0     |

---

| <b>Atom<br/>Coordinates</b> | <b><math>x</math></b> | <b><math>y</math></b> | <b><math>z</math></b> |
|-----------------------------|-----------------------|-----------------------|-----------------------|
| Ce1                         | 0.43781               | 0.42265               | 0.64631               |
| Co1                         | 0.01955               | 0.0634                | 0.45051               |
| Co2                         | 0.40216               | 0.46033               | 0.34022               |
| Co3                         | 0.13321               | 0.15394               | 0.55505               |
| Co4                         | 0.00837               | 0.3514                | 0.43866               |
| Co5                         | 0.12603               | 0.43801               | 0.53635               |
| Co6                         | 0.16315               | 0.00952               | 0.63838               |
| Co7                         | 0.19848               | 0.0525                | 0.38365               |
| Co8                         | 0.31909               | 0.14915               | 0.49585               |
| Co9                         | 0.42505               | 0.22769               | 0.58505               |
| Co10                        | 0.21205               | 0.25923               | 0.39522               |
| Co11                        | 0.32825               | 0.35801               | 0.50252               |
| Co12                        | 0.52057               | 0.06053               | 0.45178               |
| Co13                        | 0.90216               | 0.46033               | 0.34022               |
| Co14                        | 0.63839               | 0.15437               | 0.55518               |
| Co15                        | 0.50837               | 0.3514                | 0.43866               |
| Co16                        | 0.61287               | 0.42936               | 0.53112               |
| Co17                        | 0.69653               | 0.02894               | 0.64347               |
| Co18                        | 0.69848               | 0.0525                | 0.38365               |
| Co19                        | 0.82026               | 0.14906               | 0.49654               |
| Co20                        | 0.91888               | 0.23705               | 0.58741               |
| Co21                        | 0.71205               | 0.25923               | 0.39522               |
| Co22                        | 0.82363               | 0.36059               | 0.50085               |
| Co23                        | 0.95748               | 0.44228               | 0.60607               |
| Co24                        | 0.01962               | 0.56172               | 0.45085               |

---

---

|      |         |         |         |
|------|---------|---------|---------|
| Co25 | 0.40216 | 0.96033 | 0.34022 |
| Co26 | 0.13605 | 0.65556 | 0.55185 |
| Co27 | 0.00837 | 0.8514  | 0.43866 |
| Co28 | 0.12746 | 0.93692 | 0.53381 |
| Co29 | 0.20694 | 0.53092 | 0.64112 |
| Co30 | 0.19848 | 0.5525  | 0.38365 |
| Co31 | 0.31634 | 0.64854 | 0.49166 |
| Co32 | 0.43168 | 0.71598 | 0.59101 |
| Co33 | 0.21205 | 0.75923 | 0.39522 |
| Co34 | 0.33209 | 0.85618 | 0.50353 |
| Co35 | 0.44609 | 0.93038 | 0.60181 |
| Co36 | 0.51923 | 0.563   | 0.44965 |
| Co37 | 0.90216 | 0.96033 | 0.34022 |
| Co38 | 0.6409  | 0.64598 | 0.55545 |
| Co39 | 0.50837 | 0.8514  | 0.43866 |
| Co40 | 0.62817 | 0.93701 | 0.54049 |
| Co41 | 0.70248 | 0.45766 | 0.62171 |
| Co42 | 0.69848 | 0.5525  | 0.38365 |
| Co43 | 0.82046 | 0.6486  | 0.49654 |
| Co44 | 0.92733 | 0.73162 | 0.58947 |
| Co45 | 0.71205 | 0.75923 | 0.39522 |
| Co46 | 0.826   | 0.85677 | 0.50129 |
| Co47 | 0.95622 | 0.94456 | 0.60799 |
| P1   | 0.40211 | 0.23206 | 0.42916 |
| P2   | 0.015   | 0.32302 | 0.53591 |
| P3   | 0.14138 | 0.39463 | 0.6426  |
| P4   | 0.00842 | 0.07968 | 0.34972 |
| P5   | 0.13486 | 0.17385 | 0.45587 |
| P6   | 0.23864 | 0.2738  | 0.5749  |
| P7   | 0.05349 | 0.31808 | 0.33667 |
| P8   | 0.17495 | 0.41676 | 0.43746 |
| P9   | 0.27759 | 0.00625 | 0.56255 |
| P10  | 0.35704 | 0.49365 | 0.4422  |
| P11  | 0.47155 | 0.06793 | 0.55395 |
| P12  | 0.04667 | 0.16265 | 0.65058 |

---

---

|     |         |         |         |
|-----|---------|---------|---------|
| P13 | 0.90211 | 0.23206 | 0.42916 |
| P14 | 0.51554 | 0.3147  | 0.53347 |
| P15 | 0.50842 | 0.07968 | 0.34972 |
| P16 | 0.63559 | 0.17212 | 0.45605 |
| P17 | 0.7316  | 0.28463 | 0.57657 |
| P18 | 0.55349 | 0.31808 | 0.33667 |
| P19 | 0.67496 | 0.41676 | 0.43745 |
| P20 | 0.78806 | 0.00688 | 0.55941 |
| P21 | 0.85704 | 0.49365 | 0.4422  |
| P22 | 0.97649 | 0.07653 | 0.55272 |
| P23 | 0.56047 | 0.17637 | 0.65122 |
| P24 | 0.40211 | 0.73206 | 0.42916 |
| P25 | 0.01335 | 0.8242  | 0.5362  |
| P26 | 0.12998 | 0.85535 | 0.64938 |
| P27 | 0.00842 | 0.57968 | 0.34972 |
| P28 | 0.13073 | 0.67554 | 0.45408 |
| P29 | 0.24434 | 0.77262 | 0.57131 |
| P30 | 0.05349 | 0.81808 | 0.33667 |
| P31 | 0.17495 | 0.91676 | 0.43746 |
| P32 | 0.28324 | 0.51137 | 0.55397 |
| P33 | 0.35704 | 0.99365 | 0.4422  |
| P34 | 0.46753 | 0.56471 | 0.54888 |
| P35 | 0.07753 | 0.69147 | 0.65028 |
| P36 | 0.90211 | 0.73206 | 0.42916 |
| P37 | 0.51973 | 0.81124 | 0.53671 |
| P38 | 0.61697 | 0.90025 | 0.6438  |
| P39 | 0.50842 | 0.57968 | 0.34972 |
| P40 | 0.63561 | 0.6722  | 0.45624 |
| P41 | 0.73811 | 0.77338 | 0.5785  |
| P42 | 0.55349 | 0.81808 | 0.33667 |
| P43 | 0.67496 | 0.91675 | 0.43746 |
| P44 | 0.79932 | 0.50989 | 0.55567 |
| P45 | 0.85704 | 0.99365 | 0.4422  |
| P46 | 0.97897 | 0.5763  | 0.55249 |

---



---

|     |         |         |        |
|-----|---------|---------|--------|
| P47 | 0.56216 | 0.59512 | 0.6437 |
|-----|---------|---------|--------|

---

Table S5 Unit-cell and position parameters of the optimized model for the adsorption of HMF on CoP

| <b>CoP</b>                  |                       |                       |                       |
|-----------------------------|-----------------------|-----------------------|-----------------------|
| $a$ (Å)                     |                       | 12.06880              |                       |
| $b$ (Å)                     |                       | 12.89130              |                       |
| $c$ (Å)                     |                       | 22.27670              |                       |
| $\alpha$ (deg)              |                       | 90.0                  |                       |
| $\beta$ (deg)               |                       | 90.0                  |                       |
| $\gamma$ (deg)              |                       | 74.0                  |                       |
| <b>Atom<br/>Coordinates</b> | <b><math>x</math></b> | <b><math>y</math></b> | <b><math>z</math></b> |
| P1                          | 0.40211               | 0.23206               | 0.42916               |
| P2                          | 0.01676               | 0.32023               | 0.53554               |
| P3                          | 0.12581               | 0.39701               | 0.64341               |
| P4                          | 0.00842               | 0.07968               | 0.34972               |
| P5                          | 0.13414               | 0.17337               | 0.45555               |
| P6                          | 0.23616               | 0.27647               | 0.57536               |
| P7                          | 0.05349               | 0.31808               | 0.33667               |
| P8                          | 0.17495               | 0.41676               | 0.43746               |
| P9                          | 0.28931               | 0.00772               | 0.55877               |
| P10                         | 0.35704               | 0.49365               | 0.4422                |
| P11                         | 0.47749               | 0.07442               | 0.55154               |
| P12                         | 0.06035               | 0.16394               | 0.64933               |
| P13                         | 0.90211               | 0.23206               | 0.42916               |
| P14                         | 0.51405               | 0.32131               | 0.53569               |
| P15                         | 0.62873               | 0.41193               | 0.63507               |
| P16                         | 0.50842               | 0.07968               | 0.34972               |
| P17                         | 0.63466               | 0.1738                | 0.45606               |
| P18                         | 0.73798               | 0.27648               | 0.57526               |
| P19                         | 0.55349               | 0.31808               | 0.33667               |
| P20                         | 0.67496               | 0.41676               | 0.43745               |
| P21                         | 0.7796                | 0.00662               | 0.56198               |
| P22                         | 0.85704               | 0.49365               | 0.4422                |
| P23                         | 0.97126               | 0.0728                | 0.55217               |
| P24                         | 0.55068               | 0.16079               | 0.6501                |
| P25                         | 0.40211               | 0.73206               | 0.42916               |

---

|     |         |         |         |
|-----|---------|---------|---------|
| P26 | 0.01845 | 0.81989 | 0.53509 |
| P27 | 0.12227 | 0.89681 | 0.64407 |
| P28 | 0.00842 | 0.57968 | 0.34972 |
| P29 | 0.13352 | 0.67379 | 0.45534 |
| P30 | 0.23683 | 0.77654 | 0.57656 |
| P31 | 0.05349 | 0.81808 | 0.33667 |
| P32 | 0.17495 | 0.91676 | 0.43746 |
| P33 | 0.2863  | 0.50945 | 0.55664 |
| P34 | 0.35704 | 0.99365 | 0.4422  |
| P35 | 0.47408 | 0.57533 | 0.55115 |
| P36 | 0.06075 | 0.6596  | 0.64924 |
| P37 | 0.90211 | 0.73206 | 0.42916 |
| P38 | 0.51323 | 0.82326 | 0.53599 |
| P39 | 0.62838 | 0.8554  | 0.65044 |
| P40 | 0.50842 | 0.57968 | 0.34972 |
| P41 | 0.63381 | 0.67382 | 0.4552  |
| P42 | 0.7398  | 0.77277 | 0.57094 |
| P43 | 0.55349 | 0.81808 | 0.33667 |
| P44 | 0.67496 | 0.91675 | 0.43746 |
| P45 | 0.77945 | 0.50553 | 0.56272 |
| P46 | 0.85704 | 0.99365 | 0.4422  |
| P47 | 0.97169 | 0.57253 | 0.55131 |
| P48 | 0.57005 | 0.69107 | 0.64939 |
| C1  | 0.59688 | 0.4859  | 0.76915 |
| C2  | 0.50353 | 0.57649 | 0.7749  |
| C3  | 0.40387 | 0.53966 | 0.77967 |
| C4  | 0.44065 | 0.42813 | 0.77724 |
| C5  | 0.37721 | 0.3436  | 0.77929 |
| C6  | 0.71361 | 0.4675  | 0.74951 |
| O1  | 0.55738 | 0.39411 | 0.77211 |
| O2  | 0.2565  | 0.38928 | 0.78326 |
| O3  | 0.76074 | 0.54343 | 0.73669 |
| H1  | 0.50789 | 0.65937 | 0.77405 |
| H2  | 0.31499 | 0.58721 | 0.78448 |
| H3  | 0.40419 | 0.29269 | 0.81939 |

---

---

|      |         |         |         |
|------|---------|---------|---------|
| H4   | 0.40218 | 0.29015 | 0.73974 |
| H5   | 0.22594 | 0.40753 | 0.74246 |
| H6   | 0.76648 | 0.38256 | 0.749   |
| Co1  | 0.02075 | 0.06078 | 0.45155 |
| Co2  | 0.40216 | 0.46033 | 0.34022 |
| Co3  | 0.13765 | 0.15475 | 0.55412 |
| Co4  | 0.00837 | 0.3514  | 0.43866 |
| Co5  | 0.12812 | 0.44087 | 0.53883 |
| Co6  | 0.20086 | 0.02537 | 0.64301 |
| Co7  | 0.19848 | 0.0525  | 0.38365 |
| Co8  | 0.32016 | 0.14662 | 0.49481 |
| Co9  | 0.42206 | 0.23228 | 0.58697 |
| Co10 | 0.21205 | 0.25923 | 0.39522 |
| Co11 | 0.32626 | 0.35827 | 0.50083 |
| Co12 | 0.45011 | 0.44304 | 0.60403 |
| Co13 | 0.52005 | 0.06288 | 0.45035 |
| Co14 | 0.90216 | 0.46033 | 0.34022 |
| Co15 | 0.63564 | 0.15467 | 0.55574 |
| Co16 | 0.50837 | 0.3514  | 0.43866 |
| Co17 | 0.62191 | 0.43731 | 0.53295 |
| Co18 | 0.66674 | 0.00735 | 0.63803 |
| Co19 | 0.69848 | 0.0525  | 0.38365 |
| Co20 | 0.81845 | 0.14768 | 0.49431 |
| Co21 | 0.92521 | 0.22861 | 0.58778 |
| Co22 | 0.71205 | 0.25923 | 0.39522 |
| Co23 | 0.82836 | 0.35819 | 0.50266 |
| Co24 | 0.94966 | 0.43863 | 0.60459 |
| Co25 | 0.02025 | 0.56102 | 0.45082 |
| Co26 | 0.40216 | 0.96033 | 0.34022 |
| Co27 | 0.137   | 0.65539 | 0.55398 |
| Co28 | 0.00837 | 0.8514  | 0.43866 |
| Co29 | 0.12865 | 0.94122 | 0.54112 |
| Co30 | 0.20528 | 0.52479 | 0.64197 |
| Co31 | 0.19848 | 0.5525  | 0.38365 |
| Co32 | 0.3191  | 0.64818 | 0.49486 |

---

|      |         |         |         |
|------|---------|---------|---------|
| Co33 | 0.42527 | 0.73085 | 0.58789 |
| Co34 | 0.21205 | 0.75923 | 0.39522 |
| Co35 | 0.32535 | 0.85731 | 0.50081 |
| Co36 | 0.45634 | 0.94426 | 0.60735 |
| Co37 | 0.51943 | 0.56288 | 0.44997 |
| Co38 | 0.90216 | 0.96033 | 0.34022 |
| Co39 | 0.63555 | 0.64988 | 0.55398 |
| Co40 | 0.50837 | 0.8514  | 0.43866 |
| Co41 | 0.62865 | 0.93514 | 0.53414 |
| Co42 | 0.71079 | 0.54123 | 0.65387 |
| Co43 | 0.69848 | 0.5525  | 0.38365 |
| Co44 | 0.81868 | 0.6476  | 0.49408 |
| Co45 | 0.92639 | 0.72795 | 0.58742 |
| Co46 | 0.71205 | 0.75923 | 0.39522 |
| Co47 | 0.82999 | 0.85845 | 0.50174 |
| Co48 | 0.94793 | 0.93639 | 0.60325 |

Table S6 Unit-cell and position parameters of the optimized model for the adsorption of HMF on 5.2%Ce-CoP

**5.2%Ce-CoP**

| $a$ (Å)                     |                       | 12.06880              |                       |
|-----------------------------|-----------------------|-----------------------|-----------------------|
| $b$ (Å)                     |                       | 12.89130              |                       |
| $c$ (Å)                     |                       | 22.27670              |                       |
| $\alpha$ (deg)              |                       | 90.0                  |                       |
| $\beta$ (deg)               |                       | 90.0                  |                       |
| $\gamma$ (deg)              |                       | 74.0                  |                       |
| <b>Atom<br/>Coordinates</b> | <b><math>x</math></b> | <b><math>y</math></b> | <b><math>z</math></b> |
| C1                          | 0.49202               | 0.4632                | 0.75681               |
| C2                          | 0.43904               | 0.57553               | 0.75235               |
| C3                          | 0.31956               | 0.59299               | 0.74724               |
| C4                          | 0.29198               | 0.49185               | 0.74539               |
| C5                          | 0.20051               | 0.46107               | 0.78314               |
| C6                          | 0.60431               | 0.39953               | 0.74293               |
| Ce1                         | 0.46376               | 0.42457               | 0.6471                |
| P1                          | 0.40211               | 0.23206               | 0.42916               |
| P2                          | 0.01663               | 0.32183               | 0.53474               |
| P3                          | 0.13549               | 0.40881               | 0.63849               |
| P4                          | 0.00842               | 0.07968               | 0.34972               |
| P5                          | 0.13573               | 0.1734                | 0.45628               |
| P6                          | 0.24064               | 0.27688               | 0.57557               |
| P7                          | 0.05349               | 0.31808               | 0.33667               |
| P8                          | 0.17495               | 0.41676               | 0.43746               |
| P9                          | 0.27707               | 0.0059                | 0.56335               |
| P10                         | 0.35704               | 0.49365               | 0.4422                |
| P11                         | 0.47156               | 0.0702                | 0.554                 |
| P12                         | 0.04862               | 0.16528               | 0.65078               |
| P13                         | 0.90211               | 0.23206               | 0.42916               |
| P14                         | 0.52172               | 0.31818               | 0.53331               |
| P15                         | 0.50842               | 0.07968               | 0.34972               |
| P16                         | 0.63439               | 0.173                 | 0.45525               |
| P17                         | 0.73733               | 0.27613               | 0.5719                |
| P18                         | 0.55349               | 0.31808               | 0.33667               |
| P19                         | 0.67496               | 0.41676               | 0.43745               |
| P20                         | 0.78943               | 0.00608               | 0.55841               |

---

|     |         |         |         |
|-----|---------|---------|---------|
| P21 | 0.85704 | 0.49365 | 0.4422  |
| P22 | 0.97731 | 0.0746  | 0.55292 |
| P23 | 0.56227 | 0.17305 | 0.64993 |
| P24 | 0.40211 | 0.73206 | 0.42916 |
| P25 | 0.01256 | 0.82264 | 0.53616 |
| P26 | 0.12658 | 0.85503 | 0.65027 |
| P27 | 0.00842 | 0.57968 | 0.34972 |
| P28 | 0.13232 | 0.67448 | 0.45461 |
| P29 | 0.2382  | 0.77332 | 0.57028 |
| P30 | 0.05349 | 0.81808 | 0.33667 |
| P31 | 0.17495 | 0.91676 | 0.43746 |
| P32 | 0.2847  | 0.51024 | 0.56064 |
| P33 | 0.35704 | 0.99365 | 0.4422  |
| P34 | 0.46973 | 0.56871 | 0.5492  |
| P35 | 0.07483 | 0.68565 | 0.64996 |
| P36 | 0.90211 | 0.73206 | 0.42916 |
| P37 | 0.51902 | 0.81645 | 0.53491 |
| P38 | 0.61879 | 0.89978 | 0.64425 |
| P39 | 0.50842 | 0.57968 | 0.34972 |
| P40 | 0.63614 | 0.67168 | 0.45595 |
| P41 | 0.73794 | 0.77302 | 0.57739 |
| P42 | 0.55349 | 0.81808 | 0.33667 |
| P43 | 0.67496 | 0.91675 | 0.43746 |
| P44 | 0.78354 | 0.50326 | 0.56311 |
| P45 | 0.85704 | 0.99365 | 0.4422  |
| P46 | 0.97443 | 0.57443 | 0.55183 |
| P47 | 0.5546  | 0.6538  | 0.64699 |
| Co1 | 0.01956 | 0.06331 | 0.45033 |
| Co2 | 0.40216 | 0.46033 | 0.34022 |
| Co3 | 0.13537 | 0.15486 | 0.55596 |
| Co4 | 0.00837 | 0.3514  | 0.43866 |
| Co5 | 0.12486 | 0.43819 | 0.53537 |
| Co6 | 0.16098 | 0.00931 | 0.63851 |
| Co7 | 0.19848 | 0.0525  | 0.38365 |
| Co8 | 0.3196  | 0.15039 | 0.49582 |

---

---

|      |         |         |         |
|------|---------|---------|---------|
| Co9  | 0.42842 | 0.23028 | 0.58461 |
| Co10 | 0.21205 | 0.25923 | 0.39522 |
| Co11 | 0.32989 | 0.36112 | 0.50375 |
| Co12 | 0.52081 | 0.0606  | 0.4521  |
| Co13 | 0.90216 | 0.46033 | 0.34022 |
| Co14 | 0.63869 | 0.15187 | 0.55309 |
| Co15 | 0.50837 | 0.3514  | 0.43866 |
| Co16 | 0.6248  | 0.43616 | 0.54063 |
| Co17 | 0.69848 | 0.02759 | 0.64254 |
| Co18 | 0.69848 | 0.0525  | 0.38365 |
| Co19 | 0.82072 | 0.1483  | 0.49576 |
| Co20 | 0.92234 | 0.23471 | 0.58622 |
| Co21 | 0.71205 | 0.25923 | 0.39522 |
| Co22 | 0.8252  | 0.35898 | 0.50022 |
| Co23 | 0.9551  | 0.43982 | 0.60372 |
| Co24 | 0.01983 | 0.56251 | 0.45066 |
| Co25 | 0.40216 | 0.96033 | 0.34022 |
| Co26 | 0.13555 | 0.65125 | 0.55271 |
| Co27 | 0.00837 | 0.8514  | 0.43866 |
| Co28 | 0.12637 | 0.93577 | 0.53364 |
| Co29 | 0.21808 | 0.53449 | 0.65391 |
| Co30 | 0.19848 | 0.5525  | 0.38365 |
| Co31 | 0.31658 | 0.64885 | 0.49202 |
| Co32 | 0.42378 | 0.72437 | 0.58467 |
| Co33 | 0.21205 | 0.75923 | 0.39522 |
| Co34 | 0.32902 | 0.85946 | 0.50183 |
| Co35 | 0.44624 | 0.93256 | 0.60251 |
| Co36 | 0.52087 | 0.56004 | 0.45056 |
| Co37 | 0.90216 | 0.96033 | 0.34022 |
| Co38 | 0.63771 | 0.64909 | 0.55484 |
| Co39 | 0.50837 | 0.8514  | 0.43866 |
| Co40 | 0.6283  | 0.93764 | 0.54139 |
| Co41 | 0.67677 | 0.50404 | 0.64323 |
| Co42 | 0.69848 | 0.5525  | 0.38365 |
| Co43 | 0.81971 | 0.64795 | 0.49593 |

---



---

|      |         |         |         |
|------|---------|---------|---------|
| Co44 | 0.92666 | 0.72972 | 0.58893 |
| Co45 | 0.71205 | 0.75923 | 0.39522 |
| Co46 | 0.82547 | 0.85658 | 0.50103 |
| Co47 | 0.95563 | 0.9428  | 0.6082  |
| O1   | 0.40239 | 0.40995 | 0.75289 |
| O2   | 0.09356 | 0.54099 | 0.78295 |
| O3   | 0.68308 | 0.44003 | 0.71872 |
| H1   | 0.48439 | 0.63697 | 0.75679 |
| H2   | 0.25536 | 0.67077 | 0.74916 |
| H3   | 0.23024 | 0.45346 | 0.83017 |
| H4   | 0.1934  | 0.38146 | 0.76815 |
| H5   | 0.06429 | 0.5479  | 0.74159 |
| H6   | 0.62785 | 0.3125  | 0.75236 |

---

## References

1. G. Kresse and J. Furthmüller, *Comp. Mater. Sci.*, 1996, **6**, 15-50.
2. P. E. Blöchl, *Phy. Rev. B*, 1994, **50**, 17953-17979.
3. J. P. Perdew, J. A. Chevary, S. H. Vosko, K. A. Jackson, M. R. Pederson, D. J.

- Singh and C. Fiolhais, *Phy. Rev. B*, 1992, **46**, 6671-6687.
4. N. Jiang, B. You, R. Boonstra, I. M. Terrero Rodriguez and Y. Sun, *ACS Energy Lett.*, 2016, **1**, 386-390.
  5. M. J. Kang, H. J. Yu, H. S. Kim and H. G. Cha, *New J. Chem.*, 2020, **44**, 14239-14245.
  6. M. Zhang, Y. Liu, B. Liu, Z. Chen, H. Xu and K. Yan, *ACS Catal.*, 2020, **10**, 5179-5189.
  7. M. J. Kang, H. Park, J. Jegal, S. Y. Hwang, Y. S. Kang and H. G. Cha, *Appl. Catal. B*, 2019, **242**, 85-91.
  8. H. Wang, C. Li, J. An, Y. Zhuang and S. Tao, *J. Mater. Chem. A*, 2021, **9**, 18421-18430.
  9. Y. Lu, C.-L. Dong, Y.-C. Huang, Y. Zou, Z. Liu, Y. Liu, Y. Li, N. He, J. Shi and S. Wang, *Angew. Chem. Int. Ed.*, 2020, **59**, 19215-19221.
  10. D.-H. Nam, B. J. Taitt and K.-S. Choi, *ACS Catal.*, 2018, **8**, 1197-1206.
  11. H. Chen, J. Wang, Y. Yao, Z. Zhang, Z. Yang, J. Li, K. Chen, X. Lu, P. Ouyang and J. Fu, *ChemElectroChem*, 2019, **6**, 5797-5801.
  12. M. Zhang, Y. Liu, B. Liu, Z. Chen, H. Xu and K. Yan, *ACS Catal.*, 2020, **10**, 5179-5189.
  13. J. Zhang, P. Yu, G. Zeng, F. Bao, Y. Yuan and H. Huang, *J. Mater. Chem. A*, 2021, **9**, 9685-9691.
  14. S. Li, X. Sun, Z. Yao, X. Zhong, Y. Cao, Y. Liang, Z. Wei, S. Deng, G. Zhuang, X. Li and J. Wang, *Adv. Funct. Mater.*, 2019, **29**, 1904780.

15. L. Wang, J. Cao, C. Lei, Q. Dai, B. Yang, Z. Li, X. Zhang, C. Yuan, L. Lei and Y. Hou, *ACS Appl. Mater. Interfaces*, 2019, **11**, 27743-27750.
